# Supplementary material for: Massive over-representation of solute-binding proteins (SBPs) from the tripartite tricarboxylate transporter (TTT) family in the genome of the α-proteobacterium Rhodoplanes sp. Z2-YC6860
Source: PubMed Central journal article supplement (PMC5994714; doi:10.1099/mgen.0.000176), 2018-04-18
Supplement: mgen-4-176-s001.pdf [file mgen-4-176-s001.pdf]

Table S1

Supplementary Table 1 for the manuscript "Massive overrepresentation of solute binding proteins (SBPs) from the tripartite tricarboxylate transporter  
Supplementary Table 1: TBLASTN searches of the 434 TctC homologs from *Rhodoplanes sp. Z2*-YC6860 against the complete genomes of 2323 dif

|                                            |                                                     |                     | <b>Best blast</b>                      |                           |
|--------------------------------------------|-----------------------------------------------------|---------------------|----------------------------------------|---------------------------|
| <b>Rhodoplanes sp Z2 query sequence ID</b> | <b>Rhodoplanes sp Z2 query sequence (locus tag)</b> | <b>Subclass</b>     | <b>Species/Accession</b>               | <b>Assembly accession</b> |
| AMN43374.1_4909                            | RHPLAN_49500                                        | Alphaproteobacteria | Bosea sp PAMC 26642                    | GCA_001562255.1           |
| AMN38755.1_290                             | RHPLAN_02900                                        | Alphaproteobacteria | Bradyrhizobium diazoefficiens USDA 110 | GCA_000011365.1           |
| AMN42205.1_3740                            | RHPLAN_37730                                        | Alphaproteobacteria | Bradyrhizobium diazoefficiens USDA 110 | GCA_000011365.1           |
| AMN44588.1_6123                            | RHPLAN_61770                                        | Alphaproteobacteria | Bradyrhizobium icense                  | GCA_001693385.1           |
| AMN40138.1_1673                            | RHPLAN_16830                                        | Alphaproteobacteria | Bradyrhizobium icense                  | GCA_001693385.1           |
| AMN40365.1_1900                            | RHPLAN_19140                                        | Alphaproteobacteria | Bradyrhizobium icense                  | GCA_001693385.1           |
| AMN42074.1_3609                            | RHPLAN_36420                                        | Alphaproteobacteria | Bradyrhizobium icense                  | GCA_001693385.1           |
| AMN42447.1_3982                            | RHPLAN_40150                                        | Alphaproteobacteria | Bradyrhizobium icense                  | GCA_001693385.1           |
| AMN39510.1_1045                            | RHPLAN_10480                                        | Alphaproteobacteria | Bradyrhizobium icense                  | GCA_001693385.1           |
| AMN40610.1_2145                            | RHPLAN_21700                                        | Alphaproteobacteria | Bradyrhizobium icense                  | GCA_001693385.1           |
| AMN39129.1_664                             | RHPLAN_06670                                        | Alphaproteobacteria | Bradyrhizobium icense                  | GCA_001693385.1           |
| AMN42029.1_3564                            | RHPLAN_35970                                        | Alphaproteobacteria | Bradyrhizobium icense                  | GCA_001693385.1           |
| AMN40139.1_1674                            | RHPLAN_16840                                        | Alphaproteobacteria | Bradyrhizobium icense                  | GCA_001693385.1           |
| AMN39236.1_771                             | RHPLAN_07740                                        | Alphaproteobacteria | Bradyrhizobium icense                  | GCA_001693385.1           |
| AMN44544.1_6079                            | RHPLAN_61330                                        | Alphaproteobacteria | Bradyrhizobium icense                  | GCA_001693385.1           |
| AMN41087.1_2622                            | RHPLAN_26490                                        | Alphaproteobacteria | Bradyrhizobium icense                  | GCA_001693385.1           |
| AMN42032.1_3567                            | RHPLAN_36000                                        | Alphaproteobacteria | Bradyrhizobium icense                  | GCA_001693385.1           |
| AMN44352.1_5887                            | RHPLAN_59410                                        | Alphaproteobacteria | Bradyrhizobium icense                  | GCA_001693385.1           |
| AMN41027.1_2562                            | RHPLAN_25890                                        | Alphaproteobacteria | Bradyrhizobium japonicum USDA 6        | GCA_000284375.1           |
| AMN40110.1_1645                            | RHPLAN_16550                                        | Alphaproteobacteria | Bradyrhizobium japonicum USDA 6        | GCA_000284375.1           |
| AMN40369.1_1904                            | RHPLAN_19180                                        | Alphaproteobacteria | Bradyrhizobium japonicum USDA 6        | GCA_000284375.1           |
| AMN44534.1_6069                            | RHPLAN_61230                                        | Alphaproteobacteria | Bradyrhizobium oligotrophicum S58      | GCA_000344805.1           |
| AMN45483.1_7018                            | RHPLAN_70780                                        | Alphaproteobacteria | Bradyrhizobium oligotrophicum S58      | GCA_000344805.1           |
| AMN41035.1_2570                            | RHPLAN_25970                                        | Alphaproteobacteria | Bradyrhizobium oligotrophicum S58      | GCA_000344805.1           |
| AMN44583.1_6118                            | RHPLAN_61720                                        | Alphaproteobacteria | Bradyrhizobium oligotrophicum S58      | GCA_000344805.1           |

Table S1

|                 |              |                     |                                |                 |
|-----------------|--------------|---------------------|--------------------------------|-----------------|
| AMN44756.1_6291 | RHPLAN_63500 | Alphaproteobacteria | Polymorphum gilvum SL003B 26A1 | GCA_000192745.1 |
| AMN39763.1_1298 | RHPLAN_13080 | Alphaproteobacteria | Pseudorhodoplanes sinuspersici | GCA_002119765.1 |
| AMN42217.1_3752 | RHPLAN_37850 | Alphaproteobacteria | Pseudorhodoplanes sinuspersici | GCA_002119765.1 |
| AMN39434.1_969  | RHPLAN_09720 | Alphaproteobacteria | Pseudorhodoplanes sinuspersici | GCA_002119765.1 |
| AMN44166.1_5701 | RHPLAN_57520 | Alphaproteobacteria | Pseudorhodoplanes sinuspersici | GCA_002119765.1 |
| AMN39632.1_1167 | RHPLAN_11700 | Alphaproteobacteria | Pseudorhodoplanes sinuspersici | GCA_002119765.1 |
| AMN42955.1_4490 | RHPLAN_45260 | Alphaproteobacteria | Pseudorhodoplanes sinuspersici | GCA_002119765.1 |
| AMN41213.1_2748 | RHPLAN_27760 | Alphaproteobacteria | Pseudorhodoplanes sinuspersici | GCA_002119765.1 |
| AMN43240.1_4775 | RHPLAN_48160 | Alphaproteobacteria | Pseudorhodoplanes sinuspersici | GCA_002119765.1 |
| AMN39776.1_1311 | RHPLAN_13210 | Alphaproteobacteria | Pseudorhodoplanes sinuspersici | GCA_002119765.1 |
| AMN44322.1_5857 | RHPLAN_59110 | Alphaproteobacteria | Pseudorhodoplanes sinuspersici | GCA_002119765.1 |
| AMN43305.1_4840 | RHPLAN_48810 | Alphaproteobacteria | Pseudorhodoplanes sinuspersici | GCA_002119765.1 |
| AMN43332.1_4867 | RHPLAN_49080 | Alphaproteobacteria | Pseudorhodoplanes sinuspersici | GCA_002119765.1 |
| AMN39508.1_1043 | RHPLAN_10460 | Alphaproteobacteria | Pseudorhodoplanes sinuspersici | GCA_002119765.1 |
| AMN41662.1_3197 | RHPLAN_32270 | Alphaproteobacteria | Pseudorhodoplanes sinuspersici | GCA_002119765.1 |
| AMN41993.1_3528 | RHPLAN_35610 | Alphaproteobacteria | Pseudorhodoplanes sinuspersici | GCA_002119765.1 |
| AMN39010.1_545  | RHPLAN_05450 | Alphaproteobacteria | Pseudorhodoplanes sinuspersici | GCA_002119765.1 |
| AMN41859.1_3394 | RHPLAN_34250 | Alphaproteobacteria | Pseudorhodoplanes sinuspersici | GCA_002119765.1 |
| AMN42877.1_4412 | RHPLAN_44480 | Alphaproteobacteria | Pseudorhodoplanes sinuspersici | GCA_002119765.1 |
| AMN38828.1_363  | RHPLAN_03630 | Alphaproteobacteria | Pseudorhodoplanes sinuspersici | GCA_002119765.1 |
| AMN43245.1_4780 | RHPLAN_48210 | Alphaproteobacteria | Pseudorhodoplanes sinuspersici | GCA_002119765.1 |
| AMN44973.1_6508 | RHPLAN_65670 | Alphaproteobacteria | Pseudorhodoplanes sinuspersici | GCA_002119765.1 |
| AMN44356.1_5891 | RHPLAN_59450 | Alphaproteobacteria | Pseudorhodoplanes sinuspersici | GCA_002119765.1 |
| AMN40249.1_1784 | RHPLAN_17980 | Alphaproteobacteria | Pseudorhodoplanes sinuspersici | GCA_002119765.1 |
| AMN44487.1_6022 | RHPLAN_60760 | Alphaproteobacteria | Pseudorhodoplanes sinuspersici | GCA_002119765.1 |
| AMN44204.1_5739 | RHPLAN_57900 | Alphaproteobacteria | Pseudorhodoplanes sinuspersici | GCA_002119765.1 |
| AMN41445.1_2980 | RHPLAN_30090 | Alphaproteobacteria | Pseudorhodoplanes sinuspersici | GCA_002119765.1 |
| AMN42300.1_3835 | RHPLAN_38680 | Alphaproteobacteria | Pseudorhodoplanes sinuspersici | GCA_002119765.1 |
| AMN43007.1_4542 | RHPLAN_45780 | Alphaproteobacteria | Pseudorhodoplanes sinuspersici | GCA_002119765.1 |
| AMN43070.1_4605 | RHPLAN_46420 | Alphaproteobacteria | Pseudorhodoplanes sinuspersici | GCA_002119765.1 |
| AMN40250.1_1785 | RHPLAN_17990 | Alphaproteobacteria | Pseudorhodoplanes sinuspersici | GCA_002119765.1 |
| AMN43042.1_4577 | RHPLAN_46130 | Alphaproteobacteria | Pseudorhodoplanes sinuspersici | GCA_002119765.1 |

Table S1

|                 |              |                     |                                |                 |
|-----------------|--------------|---------------------|--------------------------------|-----------------|
| AMN41454.1_2989 | RHPLAN_30180 | Alphaproteobacteria | Pseudorhodoplanes sinuspersici | GCA_002119765.1 |
| AMN41675.1_3210 | RHPLAN_32410 | Alphaproteobacteria | Pseudorhodoplanes sinuspersici | GCA_002119765.1 |
| AMN41379.1_2914 | RHPLAN_29420 | Alphaproteobacteria | Pseudorhodoplanes sinuspersici | GCA_002119765.1 |
| AMN41856.1_3391 | RHPLAN_34220 | Alphaproteobacteria | Pseudorhodoplanes sinuspersici | GCA_002119765.1 |
| AMN40639.1_2174 | RHPLAN_21990 | Alphaproteobacteria | Pseudorhodoplanes sinuspersici | GCA_002119765.1 |
| AMN44205.1_5740 | RHPLAN_57910 | Alphaproteobacteria | Pseudorhodoplanes sinuspersici | GCA_002119765.1 |
| AMN42765.1_4300 | RHPLAN_43360 | Alphaproteobacteria | Pseudorhodoplanes sinuspersici | GCA_002119765.1 |
| AMN40938.1_2473 | RHPLAN_25000 | Alphaproteobacteria | Pseudorhodoplanes sinuspersici | GCA_002119765.1 |
| AMN40248.1_1783 | RHPLAN_17970 | Alphaproteobacteria | Pseudorhodoplanes sinuspersici | GCA_002119765.1 |
| AMN40290.1_1825 | RHPLAN_18390 | Alphaproteobacteria | Pseudorhodoplanes sinuspersici | GCA_002119765.1 |
| AMN39471.1_1006 | RHPLAN_10090 | Alphaproteobacteria | Pseudorhodoplanes sinuspersici | GCA_002119765.1 |
| AMN41270.1_2805 | RHPLAN_28330 | Alphaproteobacteria | Pseudorhodoplanes sinuspersici | GCA_002119765.1 |
| AMN40792.1_2327 | RHPLAN_23520 | Alphaproteobacteria | Pseudorhodoplanes sinuspersici | GCA_002119765.1 |
| AMN42662.1_4197 | RHPLAN_42310 | Alphaproteobacteria | Pseudorhodoplanes sinuspersici | GCA_002119765.1 |
| AMN45209.1_6744 | RHPLAN_68030 | Alphaproteobacteria | Pseudorhodoplanes sinuspersici | GCA_002119765.1 |
| AMN44591.1_6126 | RHPLAN_61800 | Alphaproteobacteria | Pseudorhodoplanes sinuspersici | GCA_002119765.1 |
| AMN39917.1_1452 | RHPLAN_14620 | Alphaproteobacteria | Pseudorhodoplanes sinuspersici | GCA_002119765.1 |
| AMN39598.1_1133 | RHPLAN_11360 | Alphaproteobacteria | Pseudorhodoplanes sinuspersici | GCA_002119765.1 |
| AMN41459.1_2994 | RHPLAN_30230 | Alphaproteobacteria | Pseudorhodoplanes sinuspersici | GCA_002119765.1 |
| AMN39470.1_1005 | RHPLAN_10080 | Alphaproteobacteria | Pseudorhodoplanes sinuspersici | GCA_002119765.1 |
| AMN40000.1_1535 | RHPLAN_15450 | Alphaproteobacteria | Pseudorhodoplanes sinuspersici | GCA_002119765.1 |
| AMN44266.1_5801 | RHPLAN_58540 | Alphaproteobacteria | Pseudorhodoplanes sinuspersici | GCA_002119765.1 |
| AMN39835.1_1370 | RHPLAN_13800 | Alphaproteobacteria | Pseudorhodoplanes sinuspersici | GCA_002119765.1 |
| AMN39468.1_1003 | RHPLAN_10060 | Alphaproteobacteria | Pseudorhodoplanes sinuspersici | GCA_002119765.1 |
| AMN40068.1_1603 | RHPLAN_16130 | Alphaproteobacteria | Pseudorhodoplanes sinuspersici | GCA_002119765.1 |
| AMN42139.1_3674 | RHPLAN_37070 | Alphaproteobacteria | Pseudorhodoplanes sinuspersici | GCA_002119765.1 |
| AMN39515.1_1050 | RHPLAN_10530 | Alphaproteobacteria | Pseudorhodoplanes sinuspersici | GCA_002119765.1 |
| AMN40964.1_2499 | RHPLAN_25260 | Alphaproteobacteria | Pseudorhodoplanes sinuspersici | GCA_002119765.1 |
| AMN39302.1_837  | RHPLAN_08400 | Alphaproteobacteria | Pseudorhodoplanes sinuspersici | GCA_002119765.1 |
| AMN39348.1_883  | RHPLAN_08860 | Alphaproteobacteria | Pseudorhodoplanes sinuspersici | GCA_002119765.1 |
| AMN43150.1_4685 | RHPLAN_47240 | Alphaproteobacteria | Pseudorhodoplanes sinuspersici | GCA_002119765.1 |
| AMN39448.1_983  | RHPLAN_09860 | Alphaproteobacteria | Pseudorhodoplanes sinuspersici | GCA_002119765.1 |

Table S1

|                 |              |                     |                                |                 |
|-----------------|--------------|---------------------|--------------------------------|-----------------|
| AMN40101.1_1636 | RHPLAN_16460 | Alphaproteobacteria | Pseudorhodoplanes sinuspersici | GCA_002119765.1 |
| AMN43187.1_4722 | RHPLAN_47630 | Alphaproteobacteria | Pseudorhodoplanes sinuspersici | GCA_002119765.1 |
| AMN44949.1_6484 | RHPLAN_65430 | Alphaproteobacteria | Pseudorhodoplanes sinuspersici | GCA_002119765.1 |
| AMN45221.1_6756 | RHPLAN_68150 | Alphaproteobacteria | Pseudorhodoplanes sinuspersici | GCA_002119765.1 |
| AMN42216.1_3751 | RHPLAN_37840 | Alphaproteobacteria | Pseudorhodoplanes sinuspersici | GCA_002119765.1 |
| AMN41777.1_3312 | RHPLAN_33430 | Alphaproteobacteria | Pseudorhodoplanes sinuspersici | GCA_002119765.1 |
| AMN45337.1_6872 | RHPLAN_69310 | Alphaproteobacteria | Pseudorhodoplanes sinuspersici | GCA_002119765.1 |
| AMN43556.1_5091 | RHPLAN_51330 | Alphaproteobacteria | Pseudorhodoplanes sinuspersici | GCA_002119765.1 |
| AMN39285.1_820  | RHPLAN_08230 | Alphaproteobacteria | Pseudorhodoplanes sinuspersici | GCA_002119765.1 |
| AMN44660.1_6195 | RHPLAN_62490 | Alphaproteobacteria | Rhodoplanes sp Z2 YC6860       | GCA_001579845.1 |
| AMN41105.1_2640 | RHPLAN_26680 | Alphaproteobacteria | Rhodoplanes sp Z2 YC6860       | GCA_001579845.1 |
| AMN44679.1_6214 | RHPLAN_62680 | Alphaproteobacteria | Rhodoplanes sp Z2 YC6860       | GCA_001579845.1 |
| AMN44853.1_6388 | RHPLAN_64470 | Alphaproteobacteria | Rhodoplanes sp Z2 YC6860       | GCA_001579845.1 |
| AMN45417.1_6952 | RHPLAN_70110 | Alphaproteobacteria | Rhodoplanes sp Z2 YC6860       | GCA_001579845.1 |
| AMN45418.1_6953 | RHPLAN_70120 | Alphaproteobacteria | Rhodoplanes sp Z2 YC6860       | GCA_001579845.1 |
| AMN45497.1_7032 | RHPLAN_70920 | Alphaproteobacteria | Rhodoplanes sp Z2 YC6860       | GCA_001579845.1 |
| AMN45498.1_7033 | RHPLAN_70930 | Alphaproteobacteria | Rhodoplanes sp Z2 YC6860       | GCA_001579845.1 |
| AMN43565.1_5100 | RHPLAN_51420 | Alphaproteobacteria | Rhodoplanes sp Z2 YC6860       | GCA_001579845.1 |
| AMN39232.1_767  | RHPLAN_07700 | Alphaproteobacteria | Rhodoplanes sp Z2 YC6860       | GCA_001579845.1 |
| AMN42088.1_3623 | RHPLAN_36560 | Alphaproteobacteria | Rhodoplanes sp Z2 YC6860       | GCA_001579845.1 |
| AMN39081.1_616  | RHPLAN_06190 | Alphaproteobacteria | Rhodoplanes sp Z2 YC6860       | GCA_001579845.1 |
| AMN43897.1_5432 | RHPLAN_54810 | Alphaproteobacteria | Rhodoplanes sp Z2 YC6860       | GCA_001579845.1 |
| AMN44369.1_5904 | RHPLAN_59580 | Alphaproteobacteria | Rhodoplanes sp Z2 YC6860       | GCA_001579845.1 |
| AMN44387.1_5922 | RHPLAN_59760 | Alphaproteobacteria | Rhodoplanes sp Z2 YC6860       | GCA_001579845.1 |
| AMN44552.1_6087 | RHPLAN_61410 | Alphaproteobacteria | Rhodoplanes sp Z2 YC6860       | GCA_001579845.1 |
| AMN43264.1_4799 | RHPLAN_48400 | Alphaproteobacteria | Rhodoplanes sp Z2 YC6860       | GCA_001579845.1 |
| AMN41292.1_2827 | RHPLAN_28550 | Alphaproteobacteria | Rhodoplanes sp Z2 YC6860       | GCA_001579845.1 |
| AMN42620.1_4155 | RHPLAN_41890 | Alphaproteobacteria | Rhodoplanes sp Z2 YC6860       | GCA_001579845.1 |
| AMN39299.1_834  | RHPLAN_08370 | Alphaproteobacteria | Rhodoplanes sp Z2 YC6860       | GCA_001579845.1 |
| AMN41457.1_2992 | RHPLAN_30210 | Alphaproteobacteria | Rhodoplanes sp Z2 YC6860       | GCA_001579845.1 |
| AMN42292.1_3827 | RHPLAN_38600 | Alphaproteobacteria | Rhodoplanes sp Z2 YC6860       | GCA_001579845.1 |
| AMN39298.1_833  | RHPLAN_08360 | Alphaproteobacteria | Rhodoplanes sp Z2 YC6860       | GCA_001579845.1 |

Table S1

|                 |              |                     |                          |                 |
|-----------------|--------------|---------------------|--------------------------|-----------------|
| AMN42083.1_3618 | RHPLAN_36510 | Alphaproteobacteria | Rhodoplanes sp Z2 YC6860 | GCA_001579845.1 |
| AMN42082.1_3617 | RHPLAN_36500 | Alphaproteobacteria | Rhodoplanes sp Z2 YC6860 | GCA_001579845.1 |
| AMN39858.1_1393 | RHPLAN_14030 | Alphaproteobacteria | Rhodoplanes sp Z2 YC6860 | GCA_001579845.1 |
| AMN41822.1_3357 | RHPLAN_33880 | Alphaproteobacteria | Rhodoplanes sp Z2 YC6860 | GCA_001579845.1 |
| AMN42802.1_4337 | RHPLAN_43730 | Alphaproteobacteria | Rhodoplanes sp Z2 YC6860 | GCA_001579845.1 |
| AMN39857.1_1392 | RHPLAN_14020 | Alphaproteobacteria | Rhodoplanes sp Z2 YC6860 | GCA_001579845.1 |
| AMN39623.1_1158 | RHPLAN_11610 | Alphaproteobacteria | Rhodoplanes sp Z2 YC6860 | GCA_001579845.1 |
| AMN41455.1_2990 | RHPLAN_30190 | Alphaproteobacteria | Rhodoplanes sp Z2 YC6860 | GCA_001579845.1 |
| AMN43852.1_5387 | RHPLAN_54360 | Alphaproteobacteria | Rhodoplanes sp Z2 YC6860 | GCA_001579845.1 |
| AMN44966.1_6501 | RHPLAN_65600 | Alphaproteobacteria | Rhodoplanes sp Z2 YC6860 | GCA_001579845.1 |
| AMN45491.1_7026 | RHPLAN_70860 | Alphaproteobacteria | Rhodoplanes sp Z2 YC6860 | GCA_001579845.1 |
| AMN40380.1_1915 | RHPLAN_19290 | Alphaproteobacteria | Rhodoplanes sp Z2 YC6860 | GCA_001579845.1 |
| AMN40814.1_2349 | RHPLAN_23740 | Alphaproteobacteria | Rhodoplanes sp Z2 YC6860 | GCA_001579845.1 |
| AMN39337.1_872  | RHPLAN_08750 | Alphaproteobacteria | Rhodoplanes sp Z2 YC6860 | GCA_001579845.1 |
| AMN42826.1_4361 | RHPLAN_43970 | Alphaproteobacteria | Rhodoplanes sp Z2 YC6860 | GCA_001579845.1 |
| AMN45310.1_6845 | RHPLAN_69040 | Alphaproteobacteria | Rhodoplanes sp Z2 YC6860 | GCA_001579845.1 |
| AMN41190.1_2725 | RHPLAN_27530 | Alphaproteobacteria | Rhodoplanes sp Z2 YC6860 | GCA_001579845.1 |
| AMN41885.1_3420 | RHPLAN_34510 | Alphaproteobacteria | Rhodoplanes sp Z2 YC6860 | GCA_001579845.1 |
| AMN42411.1_3946 | RHPLAN_39790 | Alphaproteobacteria | Rhodoplanes sp Z2 YC6860 | GCA_001579845.1 |
| AMN41396.1_2931 | RHPLAN_29590 | Alphaproteobacteria | Rhodoplanes sp Z2 YC6860 | GCA_001579845.1 |
| AMN39497.1_1032 | RHPLAN_10350 | Alphaproteobacteria | Rhodoplanes sp Z2 YC6860 | GCA_001579845.1 |
| AMN41130.1_2665 | RHPLAN_26930 | Alphaproteobacteria | Rhodoplanes sp Z2 YC6860 | GCA_001579845.1 |
| AMN39809.1_1344 | RHPLAN_13540 | Alphaproteobacteria | Rhodoplanes sp Z2 YC6860 | GCA_001579845.1 |
| AMN40100.1_1635 | RHPLAN_16450 | Alphaproteobacteria | Rhodoplanes sp Z2 YC6860 | GCA_001579845.1 |
| AMN41488.1_3023 | RHPLAN_30520 | Alphaproteobacteria | Rhodoplanes sp Z2 YC6860 | GCA_001579845.1 |
| AMN39888.1_1423 | RHPLAN_14330 | Alphaproteobacteria | Rhodoplanes sp Z2 YC6860 | GCA_001579845.1 |
| AMN40140.1_1675 | RHPLAN_16850 | Alphaproteobacteria | Rhodoplanes sp Z2 YC6860 | GCA_001579845.1 |
| AMN41398.1_2933 | RHPLAN_29610 | Alphaproteobacteria | Rhodoplanes sp Z2 YC6860 | GCA_001579845.1 |
| AMN38592.1_127  | RHPLAN_01270 | Alphaproteobacteria | Rhodoplanes sp Z2 YC6860 | GCA_001579845.1 |
| AMN39300.1_835  | RHPLAN_08380 | Alphaproteobacteria | Rhodoplanes sp Z2 YC6860 | GCA_001579845.1 |
| AMN43389.1_4924 | RHPLAN_49650 | Alphaproteobacteria | Rhodoplanes sp Z2 YC6860 | GCA_001579845.1 |
| AMN44921.1_6456 | RHPLAN_65150 | Alphaproteobacteria | Rhodoplanes sp Z2 YC6860 | GCA_001579845.1 |

Table S1

|                 |              |                     |                          |                 |
|-----------------|--------------|---------------------|--------------------------|-----------------|
| AMN43185.1_4720 | RHPLAN_47610 | Alphaproteobacteria | Rhodoplanes sp Z2 YC6860 | GCA_001579845.1 |
| AMN39494.1_1029 | RHPLAN_10320 | Alphaproteobacteria | Rhodoplanes sp Z2 YC6860 | GCA_001579845.1 |
| AMN41229.1_2764 | RHPLAN_27920 | Alphaproteobacteria | Rhodoplanes sp Z2 YC6860 | GCA_001579845.1 |
| AMN41644.1_3179 | RHPLAN_32090 | Alphaproteobacteria | Rhodoplanes sp Z2 YC6860 | GCA_001579845.1 |
| AMN41586.1_3121 | RHPLAN_31510 | Alphaproteobacteria | Rhodoplanes sp Z2 YC6860 | GCA_001579845.1 |
| AMN40364.1_1899 | RHPLAN_19130 | Alphaproteobacteria | Rhodoplanes sp Z2 YC6860 | GCA_001579845.1 |
| AMN39037.1_572  | RHPLAN_05720 | Alphaproteobacteria | Rhodoplanes sp Z2 YC6860 | GCA_001579845.1 |
| AMN40540.1_2075 | RHPLAN_21000 | Alphaproteobacteria | Rhodoplanes sp Z2 YC6860 | GCA_001579845.1 |
| AMN38594.1_129  | RHPLAN_01290 | Alphaproteobacteria | Rhodoplanes sp Z2 YC6860 | GCA_001579845.1 |
| AMN42361.1_3896 | RHPLAN_39290 | Alphaproteobacteria | Rhodoplanes sp Z2 YC6860 | GCA_001579845.1 |
| AMN43237.1_4772 | RHPLAN_48130 | Alphaproteobacteria | Rhodoplanes sp Z2 YC6860 | GCA_001579845.1 |
| AMN44922.1_6457 | RHPLAN_65160 | Alphaproteobacteria | Rhodoplanes sp Z2 YC6860 | GCA_001579845.1 |
| AMN41041.1_2576 | RHPLAN_26030 | Alphaproteobacteria | Rhodoplanes sp Z2 YC6860 | GCA_001579845.1 |
| AMN41394.1_2929 | RHPLAN_29570 | Alphaproteobacteria | Rhodoplanes sp Z2 YC6860 | GCA_001579845.1 |
| AMN43390.1_4925 | RHPLAN_49660 | Alphaproteobacteria | Rhodoplanes sp Z2 YC6860 | GCA_001579845.1 |
| AMN41773.1_3308 | RHPLAN_33390 | Alphaproteobacteria | Rhodoplanes sp Z2 YC6860 | GCA_001579845.1 |
| AMN40300.1_1835 | RHPLAN_18490 | Alphaproteobacteria | Rhodoplanes sp Z2 YC6860 | GCA_001579845.1 |
| AMN40384.1_1919 | RHPLAN_19330 | Alphaproteobacteria | Rhodoplanes sp Z2 YC6860 | GCA_001579845.1 |
| AMN39430.1_965  | RHPLAN_09680 | Alphaproteobacteria | Rhodoplanes sp Z2 YC6860 | GCA_001579845.1 |
| AMN40864.1_2399 | RHPLAN_24240 | Alphaproteobacteria | Rhodoplanes sp Z2 YC6860 | GCA_001579845.1 |
| AMN42630.1_4165 | RHPLAN_41990 | Alphaproteobacteria | Rhodoplanes sp Z2 YC6860 | GCA_001579845.1 |
| AMN38593.1_128  | RHPLAN_01280 | Alphaproteobacteria | Rhodoplanes sp Z2 YC6860 | GCA_001579845.1 |
| AMN43839.1_5374 | RHPLAN_54230 | Alphaproteobacteria | Rhodoplanes sp Z2 YC6860 | GCA_001579845.1 |
| AMN41325.1_2860 | RHPLAN_28880 | Alphaproteobacteria | Rhodoplanes sp Z2 YC6860 | GCA_001579845.1 |
| AMN43276.1_4811 | RHPLAN_48520 | Alphaproteobacteria | Rhodoplanes sp Z2 YC6860 | GCA_001579845.1 |
| AMN43810.1_5345 | RHPLAN_53940 | Alphaproteobacteria | Rhodoplanes sp Z2 YC6860 | GCA_001579845.1 |
| AMN40761.1_2296 | RHPLAN_23210 | Alphaproteobacteria | Rhodoplanes sp Z2 YC6860 | GCA_001579845.1 |
| AMN44346.1_5881 | RHPLAN_59350 | Alphaproteobacteria | Rhodoplanes sp Z2 YC6860 | GCA_001579845.1 |
| AMN40791.1_2326 | RHPLAN_23510 | Alphaproteobacteria | Rhodoplanes sp Z2 YC6860 | GCA_001579845.1 |
| AMN40114.1_1649 | RHPLAN_16590 | Alphaproteobacteria | Rhodoplanes sp Z2 YC6860 | GCA_001579845.1 |
| AMN41040.1_2575 | RHPLAN_26020 | Alphaproteobacteria | Rhodoplanes sp Z2 YC6860 | GCA_001579845.1 |
| AMN42545.1_4080 | RHPLAN_41140 | Alphaproteobacteria | Rhodoplanes sp Z2 YC6860 | GCA_001579845.1 |

Table S1

|                 |              |                     |                          |                 |
|-----------------|--------------|---------------------|--------------------------|-----------------|
| AMN41827.1_3362 | RHPLAN_33930 | Alphaproteobacteria | Rhodoplanes sp Z2 YC6860 | GCA_001579845.1 |
| AMN43514.1_5049 | RHPLAN_50910 | Alphaproteobacteria | Rhodoplanes sp Z2 YC6860 | GCA_001579845.1 |
| AMN39836.1_1371 | RHPLAN_13810 | Alphaproteobacteria | Rhodoplanes sp Z2 YC6860 | GCA_001579845.1 |
| AMN40809.1_2344 | RHPLAN_23690 | Alphaproteobacteria | Rhodoplanes sp Z2 YC6860 | GCA_001579845.1 |
| AMN38699.1_234  | RHPLAN_02340 | Alphaproteobacteria | Rhodoplanes sp Z2 YC6860 | GCA_001579845.1 |
| AMN40385.1_1920 | RHPLAN_19340 | Alphaproteobacteria | Rhodoplanes sp Z2 YC6860 | GCA_001579845.1 |
| AMN42861.1_4396 | RHPLAN_44320 | Alphaproteobacteria | Rhodoplanes sp Z2 YC6860 | GCA_001579845.1 |
| AMN44952.1_6487 | RHPLAN_65460 | Alphaproteobacteria | Rhodoplanes sp Z2 YC6860 | GCA_001579845.1 |
| AMN42703.1_4238 | RHPLAN_42730 | Alphaproteobacteria | Rhodoplanes sp Z2 YC6860 | GCA_001579845.1 |
| AMN41267.1_2802 | RHPLAN_28300 | Alphaproteobacteria | Rhodoplanes sp Z2 YC6860 | GCA_001579845.1 |
| AMN44496.1_6031 | RHPLAN_60850 | Alphaproteobacteria | Rhodoplanes sp Z2 YC6860 | GCA_001579845.1 |
| AMN45416.1_6951 | RHPLAN_70100 | Alphaproteobacteria | Rhodoplanes sp Z2 YC6860 | GCA_001579845.1 |
| AMN41517.1_3052 | RHPLAN_30810 | Alphaproteobacteria | Rhodoplanes sp Z2 YC6860 | GCA_001579845.1 |
| AMN43568.1_5103 | RHPLAN_51450 | Alphaproteobacteria | Rhodoplanes sp Z2 YC6860 | GCA_001579845.1 |
| AMN38644.1_179  | RHPLAN_01790 | Alphaproteobacteria | Rhodoplanes sp Z2 YC6860 | GCA_001579845.1 |
| AMN44072.1_5607 | RHPLAN_56560 | Alphaproteobacteria | Rhodoplanes sp Z2 YC6860 | GCA_001579845.1 |
| AMN39306.1_841  | RHPLAN_08440 | Alphaproteobacteria | Rhodoplanes sp Z2 YC6860 | GCA_001579845.1 |
| AMN41728.1_3263 | RHPLAN_32940 | Alphaproteobacteria | Rhodoplanes sp Z2 YC6860 | GCA_001579845.1 |
| AMN44609.1_6144 | RHPLAN_61980 | Alphaproteobacteria | Rhodoplanes sp Z2 YC6860 | GCA_001579845.1 |
| AMN45390.1_6925 | RHPLAN_69840 | Alphaproteobacteria | Rhodoplanes sp Z2 YC6860 | GCA_001579845.1 |
| AMN42478.1_4013 | RHPLAN_40460 | Alphaproteobacteria | Rhodoplanes sp Z2 YC6860 | GCA_001579845.1 |
| AMN39308.1_843  | RHPLAN_08460 | Alphaproteobacteria | Rhodoplanes sp Z2 YC6860 | GCA_001579845.1 |
| AMN39597.1_1132 | RHPLAN_11350 | Alphaproteobacteria | Rhodoplanes sp Z2 YC6860 | GCA_001579845.1 |
| AMN40141.1_1676 | RHPLAN_16860 | Alphaproteobacteria | Rhodoplanes sp Z2 YC6860 | GCA_001579845.1 |
| AMN41768.1_3303 | RHPLAN_33340 | Alphaproteobacteria | Rhodoplanes sp Z2 YC6860 | GCA_001579845.1 |
| AMN39418.1_953  | RHPLAN_09560 | Alphaproteobacteria | Rhodoplanes sp Z2 YC6860 | GCA_001579845.1 |
| AMN42783.1_4318 | RHPLAN_43540 | Alphaproteobacteria | Rhodoplanes sp Z2 YC6860 | GCA_001579845.1 |
| AMN44046.1_5581 | RHPLAN_56300 | Alphaproteobacteria | Rhodoplanes sp Z2 YC6860 | GCA_001579845.1 |
| AMN40597.1_2132 | RHPLAN_21570 | Alphaproteobacteria | Rhodoplanes sp Z2 YC6860 | GCA_001579845.1 |
| AMN40891.1_2426 | RHPLAN_24530 | Alphaproteobacteria | Rhodoplanes sp Z2 YC6860 | GCA_001579845.1 |
| AMN41039.1_2574 | RHPLAN_26010 | Alphaproteobacteria | Rhodoplanes sp Z2 YC6860 | GCA_001579845.1 |
| AMN43364.1_4899 | RHPLAN_49400 | Alphaproteobacteria | Rhodoplanes sp Z2 YC6860 | GCA_001579845.1 |

Table S1

|                 |              |                     |                          |                 |
|-----------------|--------------|---------------------|--------------------------|-----------------|
| AMN39036.1_571  | RHPLAN_05710 | Alphaproteobacteria | Rhodoplanes sp Z2 YC6860 | GCA_001579845.1 |
| AMN43183.1_4718 | RHPLAN_47590 | Alphaproteobacteria | Rhodoplanes sp Z2 YC6860 | GCA_001579845.1 |
| AMN41860.1_3395 | RHPLAN_34260 | Alphaproteobacteria | Rhodoplanes sp Z2 YC6860 | GCA_001579845.1 |
| AMN39007.1_542  | RHPLAN_05420 | Alphaproteobacteria | Rhodoplanes sp Z2 YC6860 | GCA_001579845.1 |
| AMN45225.1_6760 | RHPLAN_68190 | Alphaproteobacteria | Rhodoplanes sp Z2 YC6860 | GCA_001579845.1 |
| AMN40137.1_1672 | RHPLAN_16820 | Alphaproteobacteria | Rhodoplanes sp Z2 YC6860 | GCA_001579845.1 |
| AMN39592.1_1127 | RHPLAN_11300 | Alphaproteobacteria | Rhodoplanes sp Z2 YC6860 | GCA_001579845.1 |
| AMN39966.1_1501 | RHPLAN_15110 | Alphaproteobacteria | Rhodoplanes sp Z2 YC6860 | GCA_001579845.1 |
| AMN42147.1_3682 | RHPLAN_37150 | Alphaproteobacteria | Rhodoplanes sp Z2 YC6860 | GCA_001579845.1 |
| AMN42450.1_3985 | RHPLAN_40180 | Alphaproteobacteria | Rhodoplanes sp Z2 YC6860 | GCA_001579845.1 |
| AMN43567.1_5102 | RHPLAN_51440 | Alphaproteobacteria | Rhodoplanes sp Z2 YC6860 | GCA_001579845.1 |
| AMN39534.1_1069 | RHPLAN_10720 | Alphaproteobacteria | Rhodoplanes sp Z2 YC6860 | GCA_001579845.1 |
| AMN43536.1_5071 | RHPLAN_51130 | Alphaproteobacteria | Rhodoplanes sp Z2 YC6860 | GCA_001579845.1 |
| AMN44737.1_6272 | RHPLAN_63280 | Alphaproteobacteria | Rhodoplanes sp Z2 YC6860 | GCA_001579845.1 |
| AMN43801.1_5336 | RHPLAN_53850 | Alphaproteobacteria | Rhodoplanes sp Z2 YC6860 | GCA_001579845.1 |
| AMN39243.1_778  | RHPLAN_07810 | Alphaproteobacteria | Rhodoplanes sp Z2 YC6860 | GCA_001579845.1 |
| AMN42646.1_4181 | RHPLAN_42150 | Alphaproteobacteria | Rhodoplanes sp Z2 YC6860 | GCA_001579845.1 |
| AMN41061.1_2596 | RHPLAN_26230 | Alphaproteobacteria | Rhodoplanes sp Z2 YC6860 | GCA_001579845.1 |
| AMN43546.1_5081 | RHPLAN_51230 | Alphaproteobacteria | Rhodoplanes sp Z2 YC6860 | GCA_001579845.1 |
| AMN41593.1_3128 | RHPLAN_31580 | Alphaproteobacteria | Rhodoplanes sp Z2 YC6860 | GCA_001579845.1 |
| AMN40935.1_2470 | RHPLAN_24970 | Alphaproteobacteria | Rhodoplanes sp Z2 YC6860 | GCA_001579845.1 |
| AMN44623.1_6158 | RHPLAN_62120 | Alphaproteobacteria | Rhodoplanes sp Z2 YC6860 | GCA_001579845.1 |
| AMN38591.1_126  | RHPLAN_01260 | Alphaproteobacteria | Rhodoplanes sp Z2 YC6860 | GCA_001579845.1 |
| AMN44225.1_5760 | RHPLAN_58110 | Alphaproteobacteria | Rhodoplanes sp Z2 YC6860 | GCA_001579845.1 |
| AMN40360.1_1895 | RHPLAN_19090 | Alphaproteobacteria | Rhodoplanes sp Z2 YC6860 | GCA_001579845.1 |
| AMN44910.1_6445 | RHPLAN_65040 | Alphaproteobacteria | Rhodoplanes sp Z2 YC6860 | GCA_001579845.1 |
| AMN42333.1_3868 | RHPLAN_39010 | Alphaproteobacteria | Rhodoplanes sp Z2 YC6860 | GCA_001579845.1 |
| AMN42155.1_3690 | RHPLAN_37230 | Alphaproteobacteria | Rhodoplanes sp Z2 YC6860 | GCA_001579845.1 |
| AMN44909.1_6444 | RHPLAN_65030 | Alphaproteobacteria | Rhodoplanes sp Z2 YC6860 | GCA_001579845.1 |
| AMN42618.1_4153 | RHPLAN_41870 | Alphaproteobacteria | Rhodoplanes sp Z2 YC6860 | GCA_001579845.1 |
| AMN43823.1_5358 | RHPLAN_54070 | Alphaproteobacteria | Rhodoplanes sp Z2 YC6860 | GCA_001579845.1 |
| AMN42332.1_3867 | RHPLAN_39000 | Alphaproteobacteria | Rhodoplanes sp Z2 YC6860 | GCA_001579845.1 |



Table S1

|                 |              |                     |                          |                 |
|-----------------|--------------|---------------------|--------------------------|-----------------|
| AMN42827.1_4362 | RHPLAN_43980 | Alphaproteobacteria | Rhodoplanes sp Z2 YC6860 | GCA_001579845.1 |
| AMN44001.1_5536 | RHPLAN_55850 | Alphaproteobacteria | Rhodoplanes sp Z2 YC6860 | GCA_001579845.1 |
| AMN42424.1_3959 | RHPLAN_39920 | Alphaproteobacteria | Rhodoplanes sp Z2 YC6860 | GCA_001579845.1 |
| AMN39560.1_1095 | RHPLAN_10980 | Alphaproteobacteria | Rhodoplanes sp Z2 YC6860 | GCA_001579845.1 |
| AMN41595.1_3130 | RHPLAN_31600 | Alphaproteobacteria | Rhodoplanes sp Z2 YC6860 | GCA_001579845.1 |
| AMN39231.1_766  | RHPLAN_07690 | Alphaproteobacteria | Rhodoplanes sp Z2 YC6860 | GCA_001579845.1 |
| AMN39999.1_1534 | RHPLAN_15440 | Alphaproteobacteria | Rhodoplanes sp Z2 YC6860 | GCA_001579845.1 |
| AMN43096.1_4631 | RHPLAN_46680 | Alphaproteobacteria | Rhodoplanes sp Z2 YC6860 | GCA_001579845.1 |
| AMN43246.1_4781 | RHPLAN_48220 | Alphaproteobacteria | Rhodoplanes sp Z2 YC6860 | GCA_001579845.1 |
| AMN43248.1_4783 | RHPLAN_48240 | Alphaproteobacteria | Rhodoplanes sp Z2 YC6860 | GCA_001579845.1 |
| AMN43371.1_4906 | RHPLAN_49470 | Alphaproteobacteria | Rhodoplanes sp Z2 YC6860 | GCA_001579845.1 |
| AMN40142.1_1677 | RHPLAN_16870 | Alphaproteobacteria | Rhodoplanes sp Z2 YC6860 | GCA_001579845.1 |
| AMN42841.1_4376 | RHPLAN_44120 | Alphaproteobacteria | Rhodoplanes sp Z2 YC6860 | GCA_001579845.1 |
| AMN44283.1_5818 | RHPLAN_58720 | Alphaproteobacteria | Rhodoplanes sp Z2 YC6860 | GCA_001579845.1 |
| AMN41760.1_3295 | RHPLAN_33260 | Alphaproteobacteria | Rhodoplanes sp Z2 YC6860 | GCA_001579845.1 |
| AMN42917.1_4452 | RHPLAN_44880 | Alphaproteobacteria | Rhodoplanes sp Z2 YC6860 | GCA_001579845.1 |
| AMN41211.1_2746 | RHPLAN_27740 | Alphaproteobacteria | Rhodoplanes sp Z2 YC6860 | GCA_001579845.1 |
| AMN44891.1_6426 | RHPLAN_64850 | Alphaproteobacteria | Rhodoplanes sp Z2 YC6860 | GCA_001579845.1 |
| AMN38788.1_323  | RHPLAN_03230 | Alphaproteobacteria | Rhodoplanes sp Z2 YC6860 | GCA_001579845.1 |
| AMN41858.1_3393 | RHPLAN_34240 | Alphaproteobacteria | Rhodoplanes sp Z2 YC6860 | GCA_001579845.1 |
| AMN39038.1_573  | RHPLAN_05730 | Alphaproteobacteria | Rhodoplanes sp Z2 YC6860 | GCA_001579845.1 |
| AMN40387.1_1922 | RHPLAN_19360 | Alphaproteobacteria | Rhodoplanes sp Z2 YC6860 | GCA_001579845.1 |
| AMN43841.1_5376 | RHPLAN_54250 | Alphaproteobacteria | Rhodoplanes sp Z2 YC6860 | GCA_001579845.1 |
| AMN39283.1_818  | RHPLAN_08210 | Alphaproteobacteria | Rhodoplanes sp Z2 YC6860 | GCA_001579845.1 |
| AMN44488.1_6023 | RHPLAN_60770 | Alphaproteobacteria | Rhodoplanes sp Z2 YC6860 | GCA_001579845.1 |
| AMN41935.1_3470 | RHPLAN_35030 | Alphaproteobacteria | Rhodoplanes sp Z2 YC6860 | GCA_001579845.1 |
| AMN39349.1_884  | RHPLAN_08870 | Alphaproteobacteria | Rhodoplanes sp Z2 YC6860 | GCA_001579845.1 |
| AMN39786.1_1321 | RHPLAN_13310 | Alphaproteobacteria | Rhodoplanes sp Z2 YC6860 | GCA_001579845.1 |
| AMN44555.1_6090 | RHPLAN_61440 | Alphaproteobacteria | Rhodoplanes sp Z2 YC6860 | GCA_001579845.1 |
| AMN40136.1_1671 | RHPLAN_16810 | Alphaproteobacteria | Rhodoplanes sp Z2 YC6860 | GCA_001579845.1 |
| AMN39039.1_574  | RHPLAN_05740 | Alphaproteobacteria | Rhodoplanes sp Z2 YC6860 | GCA_001579845.1 |
| AMN39533.1_1068 | RHPLAN_10710 | Alphaproteobacteria | Rhodoplanes sp Z2 YC6860 | GCA_001579845.1 |

Table S1

|                 |              |                     |                          |                 |
|-----------------|--------------|---------------------|--------------------------|-----------------|
| AMN41449.1_2984 | RHPLAN_30130 | Alphaproteobacteria | Rhodoplanes sp Z2 YC6860 | GCA_001579845.1 |
| AMN43577.1_5112 | RHPLAN_51540 | Alphaproteobacteria | Rhodoplanes sp Z2 YC6860 | GCA_001579845.1 |
| AMN41446.1_2981 | RHPLAN_30100 | Alphaproteobacteria | Rhodoplanes sp Z2 YC6860 | GCA_001579845.1 |
| AMN42350.1_3885 | RHPLAN_39180 | Alphaproteobacteria | Rhodoplanes sp Z2 YC6860 | GCA_001579845.1 |
| AMN44076.1_5611 | RHPLAN_56600 | Alphaproteobacteria | Rhodoplanes sp Z2 YC6860 | GCA_001579845.1 |
| AMN43969.1_5504 | RHPLAN_55530 | Alphaproteobacteria | Rhodoplanes sp Z2 YC6860 | GCA_001579845.1 |
| AMN41209.1_2744 | RHPLAN_27720 | Alphaproteobacteria | Rhodoplanes sp Z2 YC6860 | GCA_001579845.1 |
| AMN43825.1_5360 | RHPLAN_54090 | Alphaproteobacteria | Rhodoplanes sp Z2 YC6860 | GCA_001579845.1 |
| AMN41973.1_3508 | RHPLAN_35410 | Alphaproteobacteria | Rhodoplanes sp Z2 YC6860 | GCA_001579845.1 |
| AMN39621.1_1156 | RHPLAN_11590 | Alphaproteobacteria | Rhodoplanes sp Z2 YC6860 | GCA_001579845.1 |
| AMN44967.1_6502 | RHPLAN_65610 | Alphaproteobacteria | Rhodoplanes sp Z2 YC6860 | GCA_001579845.1 |
| AMN39872.1_1407 | RHPLAN_14170 | Alphaproteobacteria | Rhodoplanes sp Z2 YC6860 | GCA_001579845.1 |
| AMN40144.1_1679 | RHPLAN_16890 | Alphaproteobacteria | Rhodoplanes sp Z2 YC6860 | GCA_001579845.1 |
| AMN40388.1_1923 | RHPLAN_19370 | Alphaproteobacteria | Rhodoplanes sp Z2 YC6860 | GCA_001579845.1 |
| AMN43372.1_4907 | RHPLAN_49480 | Alphaproteobacteria | Rhodoplanes sp Z2 YC6860 | GCA_001579845.1 |
| AMN44490.1_6025 | RHPLAN_60790 | Alphaproteobacteria | Rhodoplanes sp Z2 YC6860 | GCA_001579845.1 |
| AMN41934.1_3469 | RHPLAN_35020 | Alphaproteobacteria | Rhodoplanes sp Z2 YC6860 | GCA_001579845.1 |
| AMN40143.1_1678 | RHPLAN_16880 | Alphaproteobacteria | Rhodoplanes sp Z2 YC6860 | GCA_001579845.1 |
| AMN41930.1_3465 | RHPLAN_34980 | Alphaproteobacteria | Rhodoplanes sp Z2 YC6860 | GCA_001579845.1 |
| AMN41688.1_3223 | RHPLAN_32540 | Alphaproteobacteria | Rhodoplanes sp Z2 YC6860 | GCA_001579845.1 |
| AMN44307.1_5842 | RHPLAN_58960 | Alphaproteobacteria | Rhodoplanes sp Z2 YC6860 | GCA_001579845.1 |
| AMN43220.1_4755 | RHPLAN_47960 | Alphaproteobacteria | Rhodoplanes sp Z2 YC6860 | GCA_001579845.1 |
| AMN43926.1_5461 | RHPLAN_55100 | Alphaproteobacteria | Rhodoplanes sp Z2 YC6860 | GCA_001579845.1 |
| AMN40896.1_2431 | RHPLAN_24580 | Alphaproteobacteria | Rhodoplanes sp Z2 YC6860 | GCA_001579845.1 |
| AMN41591.1_3126 | RHPLAN_31560 | Alphaproteobacteria | Rhodoplanes sp Z2 YC6860 | GCA_001579845.1 |
| AMN40096.1_1631 | RHPLAN_16410 | Alphaproteobacteria | Rhodoplanes sp Z2 YC6860 | GCA_001579845.1 |
| AMN40527.1_2062 | RHPLAN_20870 | Alphaproteobacteria | Rhodoplanes sp Z2 YC6860 | GCA_001579845.1 |
| AMN39130.1_665  | RHPLAN_06680 | Alphaproteobacteria | Rhodoplanes sp Z2 YC6860 | GCA_001579845.1 |
| AMN39351.1_886  | RHPLAN_08890 | Alphaproteobacteria | Rhodoplanes sp Z2 YC6860 | GCA_001579845.1 |
| AMN40827.1_2362 | RHPLAN_23870 | Alphaproteobacteria | Rhodoplanes sp Z2 YC6860 | GCA_001579845.1 |
| AMN41505.1_3040 | RHPLAN_30690 | Alphaproteobacteria | Rhodoplanes sp Z2 YC6860 | GCA_001579845.1 |
| AMN38614.1_149  | RHPLAN_01490 | Alphaproteobacteria | Rhodoplanes sp Z2 YC6860 | GCA_001579845.1 |

Table S1

|                 |              |                     |                                 |                 |
|-----------------|--------------|---------------------|---------------------------------|-----------------|
| AMN42077.1_3612 | RHPLAN_36450 | Alphaproteobacteria | Rhodoplanes sp Z2 YC6860        | GCA_001579845.1 |
| AMN44278.1_5813 | RHPLAN_58670 | Alphaproteobacteria | Rhodoplanes sp Z2 YC6860        | GCA_001579845.1 |
| AMN43333.1_4868 | RHPLAN_49090 | Alphaproteobacteria | Rhodoplanes sp Z2 YC6860        | GCA_001579845.1 |
| AMN43680.1_5215 | RHPLAN_52610 | Alphaproteobacteria | Rhodoplanes sp Z2 YC6860        | GCA_001579845.1 |
| AMN42076.1_3611 | RHPLAN_36440 | Alphaproteobacteria | Rhodoplanes sp Z2 YC6860        | GCA_001579845.1 |
| AMN40506.1_2041 | RHPLAN_20660 | Alphaproteobacteria | Rhodoplanes sp Z2 YC6860        | GCA_001579845.1 |
| AMN45246.1_6781 | RHPLAN_68400 | Alphaproteobacteria | Rhodoplanes sp Z2 YC6860        | GCA_001579845.1 |
| AMN41026.1_2561 | RHPLAN_25880 | Alphaproteobacteria | Rhodoplanes sp Z2 YC6860        | GCA_001579845.1 |
| AMN44481.1_6016 | RHPLAN_60700 | Alphaproteobacteria | Rhodoplanes sp Z2 YC6860        | GCA_001579845.1 |
| AMN44649.1_6184 | RHPLAN_62380 | Alphaproteobacteria | Rhodoplanes sp Z2 YC6860        | GCA_001579845.1 |
| AMN44187.1_5722 | RHPLAN_57730 | Alphaproteobacteria | Rhodoplanes sp Z2 YC6860        | GCA_001579845.1 |
| AMN44576.1_6111 | RHPLAN_61650 | Alphaproteobacteria | Rhodoplanes sp Z2 YC6860        | GCA_001579845.1 |
| AMN41487.1_3022 | RHPLAN_30510 | Alphaproteobacteria | Rhodoplanes sp Z2 YC6860        | GCA_001579845.1 |
| AMN39854.1_1389 | RHPLAN_13990 | Alphaproteobacteria | Rhodoplanes sp Z2 YC6860        | GCA_001579845.1 |
| AMN42294.1_3829 | RHPLAN_38620 | Alphaproteobacteria | Rhodoplanes sp Z2 YC6860        | GCA_001579845.1 |
| AMN44577.1_6112 | RHPLAN_61660 | Alphaproteobacteria | Rhodoplanes sp Z2 YC6860        | GCA_001579845.1 |
| AMN44470.1_6005 | RHPLAN_60590 | Alphaproteobacteria | Rhodoplanes sp Z2 YC6860        | GCA_001579845.1 |
| AMN42219.1_3754 | RHPLAN_37870 | Alphaproteobacteria | Rhodoplanes sp Z2 YC6860        | GCA_001579845.1 |
| AMN39816.1_1351 | RHPLAN_13610 | Alphaproteobacteria | Rhodoplanes sp Z2 YC6860        | GCA_001579845.1 |
| AMN39276.1_811  | RHPLAN_08140 | Alphaproteobacteria | Roseomonas gilardii             | GCA_001941945.1 |
| AMN42163.1_3698 | RHPLAN_37310 | Alphaproteobacteria | Roseomonas gilardii             | GCA_001941945.1 |
| AMN44378.1_5913 | RHPLAN_59670 | Alphaproteobacteria | Sinorhizobium meliloti 1021     | GCA_000006965.1 |
| AMN45183.1_6718 | RHPLAN_67770 | Betaproteobacteria  | Achromobacter denitrificans     | GCA_001514355.1 |
| AMN41954.1_3489 | RHPLAN_35220 | Betaproteobacteria  | Achromobacter insolitus         | GCA_001971645.1 |
| AMN40524.1_2059 | RHPLAN_20840 | Betaproteobacteria  | Achromobacter insolitus         | GCA_001971645.1 |
| AMN45251.1_6786 | RHPLAN_68450 | Betaproteobacteria  | Achromobacter xylooxidans A8    | GCA_000165835.1 |
| AMN44857.1_6392 | RHPLAN_64510 | Betaproteobacteria  | Achromobacter xylooxidans A8    | GCA_000165835.1 |
| AMN43879.1_5414 | RHPLAN_54630 | Betaproteobacteria  | Achromobacter xylooxidans A8    | GCA_000165835.1 |
| AMN43409.1_4944 | RHPLAN_49850 | Betaproteobacteria  | Achromobacter xylooxidans A8    | GCA_000165835.1 |
| AMN40630.1_2165 | RHPLAN_21900 | Betaproteobacteria  | Advenella kashmirensis WT001    | GCA_000219915.3 |
| AMN44639.1_6174 | RHPLAN_62280 | Betaproteobacteria  | Advenella kashmirensis WT001    | GCA_000219915.3 |
| AMN40991.1_2526 | RHPLAN_25530 | Betaproteobacteria  | Alicyclophilus denitrificans BC | GCA_000179015.2 |

Table S1

|                 |              |                    |                                 |                 |
|-----------------|--------------|--------------------|---------------------------------|-----------------|
| AMN41886.1_3421 | RHPLAN_34540 | Betaproteobacteria | Alicyclophilus denitrificans BC | GCA_000179015.2 |
| AMN41645.1_3180 | RHPLAN_32100 | Betaproteobacteria | Alicyclophilus denitrificans BC | GCA_000179015.2 |
| AMN41522.1_3057 | RHPLAN_30860 | Betaproteobacteria | Alicyclophilus denitrificans BC | GCA_000179015.2 |
| AMN43548.1_5083 | RHPLAN_51250 | Betaproteobacteria | Alicyclophilus denitrificans BC | GCA_000179015.2 |
| AMN40093.1_1628 | RHPLAN_16380 | Betaproteobacteria | Bordetella bronchialis          | GCA_001676705.1 |
| AMN44321.1_5856 | RHPLAN_59100 | Betaproteobacteria | Bordetella bronchialis          | GCA_001676705.1 |
| AMN44384.1_5919 | RHPLAN_59730 | Betaproteobacteria | Bordetella bronchialis          | GCA_001676705.1 |
| AMN38627.1_162  | RHPLAN_01620 | Betaproteobacteria | Bordetella bronchialis          | GCA_001676705.1 |
| AMN41025.1_2560 | RHPLAN_25870 | Betaproteobacteria | Bordetella bronchialis          | GCA_001676705.1 |
| AMN42712.1_4247 | RHPLAN_42820 | Betaproteobacteria | Bordetella bronchiseptica RB50  | GCA_000195675.1 |
| AMN39602.1_1137 | RHPLAN_11400 | Betaproteobacteria | Bordetella flabilis             | GCA_001676725.1 |
| AMN41033.1_2568 | RHPLAN_25950 | Betaproteobacteria | Bordetella flabilis             | GCA_001676725.1 |
| AMN44911.1_6446 | RHPLAN_65050 | Betaproteobacteria | Bordetella flabilis             | GCA_001676725.1 |
| AMN45070.1_6605 | RHPLAN_66640 | Betaproteobacteria | Bordetella flabilis             | GCA_001676725.1 |
| AMN43555.1_5090 | RHPLAN_51320 | Betaproteobacteria | Bordetella flabilis             | GCA_001676725.1 |
| AMN43263.1_4798 | RHPLAN_48390 | Betaproteobacteria | Bordetella flabilis             | GCA_001676725.1 |
| AMN41861.1_3396 | RHPLAN_34270 | Betaproteobacteria | Bordetella flabilis             | GCA_001676725.1 |
| AMN41028.1_2563 | RHPLAN_25900 | Betaproteobacteria | Bordetella flabilis             | GCA_001676725.1 |
| AMN42047.1_3582 | RHPLAN_36150 | Betaproteobacteria | Bordetella genomosp 13          | GCA_002119665.1 |
| AMN44671.1_6206 | RHPLAN_62600 | Betaproteobacteria | Bordetella genomosp 13          | GCA_002119665.1 |
| AMN41520.1_3055 | RHPLAN_30840 | Betaproteobacteria | Bordetella genomosp 13          | GCA_002119665.1 |
| AMN43575.1_5110 | RHPLAN_51520 | Betaproteobacteria | Bordetella genomosp 13          | GCA_002119665.1 |
| AMN42001.1_3536 | RHPLAN_35690 | Betaproteobacteria | Bordetella genomosp 13          | GCA_002119665.1 |
| AMN41904.1_3439 | RHPLAN_34720 | Betaproteobacteria | Bordetella genomosp 13          | GCA_002119665.1 |
| AMN42443.1_3978 | RHPLAN_40110 | Betaproteobacteria | Bordetella genomosp 13          | GCA_002119665.1 |
| AMN40533.1_2068 | RHPLAN_20930 | Betaproteobacteria | Bordetella hinzii               | GCA_001078275.1 |
| AMN42645.1_4180 | RHPLAN_42140 | Betaproteobacteria | Bordetella hinzii               | GCA_001078275.1 |
| AMN39095.1_630  | RHPLAN_06330 | Betaproteobacteria | Bordetella hinzii               | GCA_001078275.1 |
| AMN45133.1_6668 | RHPLAN_67270 | Betaproteobacteria | Bordetella hinzii               | GCA_001078275.1 |
| AMN43571.1_5106 | RHPLAN_51480 | Betaproteobacteria | Bordetella hinzii               | GCA_001078275.1 |
| AMN44641.1_6176 | RHPLAN_62300 | Betaproteobacteria | Bordetella parapertussis 12822  | GCA_000195695.1 |
| AMN38525.1_60   | RHPLAN_00600 | Betaproteobacteria | Bordetella pertussis B1917      | GCA_000193595.3 |

Table S1

|                 |              |                    |                                                 |                 |
|-----------------|--------------|--------------------|-------------------------------------------------|-----------------|
| AMN42296.1_3831 | RHPLAN_38640 | Betaproteobacteria | <i>Bordetella pertussis</i> B1917               | GCA_000193595.3 |
| AMN41720.1_3255 | RHPLAN_32860 | Betaproteobacteria | <i>Bordetella petrii</i>                        | GCA_000067205.1 |
| AMN43579.1_5114 | RHPLAN_51560 | Betaproteobacteria | <i>Bordetella petrii</i>                        | GCA_000067205.1 |
| AMN40625.1_2160 | RHPLAN_21850 | Betaproteobacteria | <i>Bordetella pseudohinzii</i>                  | GCA_001698185.1 |
| AMN45341.1_6876 | RHPLAN_69350 | Betaproteobacteria | <i>Bordetella pseudohinzii</i>                  | GCA_001698185.1 |
| AMN40818.1_2353 | RHPLAN_23780 | Betaproteobacteria | <i>Bordetella</i> sp H567                       | GCA_001704295.1 |
| AMN39384.1_919  | RHPLAN_09220 | Betaproteobacteria | <i>Bordetella</i> sp H567                       | GCA_001704295.1 |
| AMN42752.1_4287 | RHPLAN_43230 | Betaproteobacteria | <i>Bordetella</i> sp H567                       | GCA_001704295.1 |
| AMN38563.1_98   | RHPLAN_00980 | Betaproteobacteria | <i>Bordetella</i> sp H567                       | GCA_001704295.1 |
| AMN42005.1_3540 | RHPLAN_35730 | Betaproteobacteria | <i>Bordetella</i> sp H567                       | GCA_001704295.1 |
| AMN39912.1_1447 | RHPLAN_14570 | Betaproteobacteria | <i>Bordetella</i> sp H567                       | GCA_001704295.1 |
| AMN43809.1_5344 | RHPLAN_53930 | Betaproteobacteria | <i>Bordetella</i> sp H567                       | GCA_001704295.1 |
| AMN39953.1_1488 | RHPLAN_14980 | Betaproteobacteria | <i>Bordetella trematum</i>                      | GCA_900078695.1 |
| AMN38654.1_189  | RHPLAN_01890 | Betaproteobacteria | <i>Cupriavidus basileensis</i>                  | GCA_000832305.1 |
| AMN40586.1_2121 | RHPLAN_21460 | Betaproteobacteria | <i>Cupriavidus basileensis</i>                  | GCA_000832305.1 |
| AMN44254.1_5789 | RHPLAN_58410 | Betaproteobacteria | <i>Cupriavidus basileensis</i>                  | GCA_000832305.1 |
| AMN41157.1_2692 | RHPLAN_27200 | Betaproteobacteria | <i>Cupriavidus basileensis</i>                  | GCA_000832305.1 |
| AMN41274.1_2809 | RHPLAN_28370 | Betaproteobacteria | <i>Cupriavidus basileensis</i>                  | GCA_000832305.1 |
| AMN44946.1_6481 | RHPLAN_65400 | Betaproteobacteria | <i>Cupriavidus basileensis</i>                  | GCA_000832305.1 |
| AMN39885.1_1420 | RHPLAN_14300 | Betaproteobacteria | <i>Cupriavidus gilardii</i> CR3                 | GCA_001281465.1 |
| AMN38535.1_70   | RHPLAN_00700 | Betaproteobacteria | <i>Cupriavidus gilardii</i> CR3                 | GCA_001281465.1 |
| AMN41132.1_2667 | RHPLAN_26950 | Betaproteobacteria | <i>Cupriavidus gilardii</i> CR3                 | GCA_001281465.1 |
| AMN42803.1_4338 | RHPLAN_43740 | Betaproteobacteria | <i>Cupriavidus metallidurans</i> CH34           | GCA_000196015.1 |
| AMN40828.1_2363 | RHPLAN_23880 | Betaproteobacteria | <i>Cupriavidus metallidurans</i> CH34           | GCA_000196015.1 |
| AMN42079.1_3614 | RHPLAN_36470 | Betaproteobacteria | <i>Cupriavidus necator</i> N 1                  | GCA_000219215.1 |
| AMN44661.1_6196 | RHPLAN_62500 | Betaproteobacteria | <i>Cupriavidus necator</i> N 1                  | GCA_000219215.1 |
| AMN45295.1_6830 | RHPLAN_68890 | Betaproteobacteria | <i>Cupriavidus</i> sp USMAHM13                  | GCA_001854285.1 |
| AMN43343.1_4878 | RHPLAN_49190 | Betaproteobacteria | <i>Cupriavidus</i> sp USMAHM13                  | GCA_001854285.1 |
| AMN41496.1_3031 | RHPLAN_30600 | Betaproteobacteria | <i>Delftia acidovorans</i> SPH 1                | GCA_000018665.1 |
| AMN41383.1_2918 | RHPLAN_29460 | Betaproteobacteria | <i>Diaphorobacter polyhydroxybutyrativorans</i> | GCA_002214645.1 |
| AMN41828.1_3363 | RHPLAN_33940 | Betaproteobacteria | <i>Diaphorobacter polyhydroxybutyrativorans</i> | GCA_002214645.1 |
| AMN44286.1_5821 | RHPLAN_58750 | Betaproteobacteria | <i>Diaphorobacter polyhydroxybutyrativorans</i> | GCA_002214645.1 |

Table S1

|                 |              |                     |                                   |                 |
|-----------------|--------------|---------------------|-----------------------------------|-----------------|
| AMN45245.1_6780 | RHPLAN_68390 | Betaproteobacteria  | Hydrogenophaga sp PBC             | GCA_000263795.2 |
| AMN41509.1_3044 | RHPLAN_30730 | Betaproteobacteria  | Hydrogenophaga sp PBC             | GCA_000263795.2 |
| AMN39899.1_1434 | RHPLAN_14440 | Betaproteobacteria  | Hydrogenophaga sp PBC             | GCA_000263795.2 |
| AMN43882.1_5417 | RHPLAN_54660 | Betaproteobacteria  | Janthinobacterium sp Marseille    | GCA_000013625.1 |
| AMN44377.1_5912 | RHPLAN_59660 | Betaproteobacteria  | Janthinobacterium sp Marseille    | GCA_000013625.1 |
| AMN40990.1_2525 | RHPLAN_25520 | Betaproteobacteria  | Leptothrix cholodnii SP 6         | GCA_000019785.1 |
| AMN41811.1_3346 | RHPLAN_33770 | Betaproteobacteria  | Limnohabitans sp 63ED37 2         | GCA_001412535.1 |
| AMN44191.1_5726 | RHPLAN_57770 | Betaproteobacteria  | Polaromonas naphthalenivorans CJ2 | GCA_000015505.1 |
| AMN40381.1_1916 | RHPLAN_19300 | Betaproteobacteria  | Polaromonas sp JS666              | GCA_000013865.1 |
| AMN44504.1_6039 | RHPLAN_60930 | Betaproteobacteria  | Polaromonas sp JS666              | GCA_000013865.1 |
| AMN45121.1_6656 | RHPLAN_67150 | Betaproteobacteria  | Polaromonas sp JS666              | GCA_000013865.1 |
| AMN38975.1_510  | RHPLAN_05100 | Betaproteobacteria  | Polaromonas sp JS666              | GCA_000013865.1 |
| AMN41222.1_2757 | RHPLAN_27850 | Betaproteobacteria  | Polaromonas sp JS666              | GCA_000013865.1 |
| AMN41255.1_2790 | RHPLAN_28180 | Betaproteobacteria  | Ralstonia eutropha H16            | GCA_000009285.2 |
| AMN39603.1_1138 | RHPLAN_11410 | Betaproteobacteria  | Ramlibacter tataouinensis TTB310  | GCA_000215705.1 |
| AMN38595.1_130  | RHPLAN_01300 | Betaproteobacteria  | Ramlibacter tataouinensis TTB310  | GCA_000215705.1 |
| AMN41781.1_3316 | RHPLAN_33470 | Betaproteobacteria  | Rhodoferax saidenbachensis        | GCA_001955715.1 |
| AMN44203.1_5738 | RHPLAN_57890 | Betaproteobacteria  | Rhodoferax sp DCY110              | GCA_001955695.1 |
| AMN42036.1_3571 | RHPLAN_36040 | Betaproteobacteria  | Rubrivivax gelatinosus IL144      | GCA_000284255.1 |
| AMN40411.1_1946 | RHPLAN_19600 | Betaproteobacteria  | Variovorax sp PAMC 28711          | GCA_001577265.1 |
| AMN42229.1_3764 | RHPLAN_37970 | Betaproteobacteria  | Verminephrobacter eiseniae EF01 2 | GCA_000015565.1 |
| AMN41135.1_2670 | RHPLAN_26980 | Betaproteobacteria  | Verminephrobacter eiseniae EF01 2 | GCA_000015565.1 |
| AMN40341.1_1876 | RHPLAN_18900 | Deltaproteobacteria | Desulfococcus oleovorans Hxd3     | GCA_000018405.1 |
| AMN41462.1_2997 | RHPLAN_30260 | Deltaproteobacteria | Desulfococcus oleovorans Hxd3     | GCA_000018405.1 |
| AMN41795.1_3330 | RHPLAN_33610 | Gammaproteobacteria | Alcanivorax dieselolei B5         | GCA_000300005.1 |

Table S1

(TTT) family in the genome of the  $\alpha$ -proteobacterium *Rhodoplanes* sp. Z2-YC6860"  
ferent species. The first two rows refer to the analysis query, while the remaining relate to the analysis result

**hit (e-value threshold = 10e-15)**

| Assembly name | Sequence ID     | Identity (%) | Alignment length | Number of mismatches | Number of gap openings | E-value   | Bit score |
|---------------|-----------------|--------------|------------------|----------------------|------------------------|-----------|-----------|
| ASM156225v1   | AMJ60317.1_1677 | 62.0         | 308              | 117                  | 0                      | 1.86E-143 | 405       |
| ASM1136v1     | BAC52326.1_7061 | 56.9         | 304              | 131                  | 0                      | 3.79E-127 | 364       |
| ASM1136v1     | BAC51735.1_6470 | 54.0         | 313              | 144                  | 0                      | 6.33E-112 | 326       |
| ASM169338v1   | ANW00367.1_1886 | 75.5         | 323              | 79                   | 0                      | 9.33E-177 | 490       |
| ASM169338v1   | ANW05692.1_3832 | 63.7         | 317              | 113                  | 1                      | 3.76E-150 | 422       |
| ASM169338v1   | ANW05692.1_3832 | 56.6         | 316              | 135                  | 2                      | 2.43E-127 | 365       |
| ASM169338v1   | ANW05692.1_3832 | 56.0         | 325              | 140                  | 2                      | 1.08E-131 | 375       |
| ASM169338v1   | ANW00602.1_2169 | 56.0         | 327              | 143                  | 1                      | 1.7E-141  | 401       |
| ASM169338v1   | ANW05692.1_3832 | 55.4         | 323              | 144                  | 0                      | 4.85E-138 | 392       |
| ASM169338v1   | ANW05692.1_3832 | 55.4         | 325              | 141                  | 3                      | 5.7E-128  | 366       |
| ASM169338v1   | ANW00602.1_2169 | 54.9         | 326              | 147                  | 0                      | 7.39E-140 | 396       |
| ASM169338v1   | ANW04363.1_6694 | 51.8         | 311              | 148                  | 1                      | 8.37E-118 | 340       |
| ASM169338v1   | ANW05692.1_3832 | 51.7         | 319              | 154                  | 0                      | 1.41E-120 | 348       |
| ASM169338v1   | ANV99810.1_1208 | 51.6         | 304              | 141                  | 3                      | 2.7E-104  | 306       |
| ASM169338v1   | ANW01425.1_3154 | 51.3         | 320              | 155                  | 1                      | 1.37E-119 | 345       |
| ASM169338v1   | ANV99613.1_966  | 49.8         | 297              | 147                  | 2                      | 1.6E-93   | 278       |
| ASM169338v1   | ANW05692.1_3832 | 46.8         | 327              | 168                  | 5                      | 8.02E-103 | 302       |
| ASM169338v1   | ANV99134.1_384  | 43.2         | 324              | 173                  | 4                      | 5.98E-78  | 239       |
| ASM28437v1    | BAL06143.1_842  | 64.3         | 325              | 116                  | 0                      | 1.62E-151 | 426       |
| ASM28437v1    | BAL07891.1_2590 | 47.0         | 319              | 165                  | 2                      | 3.69E-95  | 283       |
| ASM28437v1    | BAL07891.1_2590 | 44.2         | 319              | 173                  | 3                      | 1.24E-85  | 258       |
| ASM34480v1    | BAM90451.1_4430 | 71.7         | 325              | 88                   | 2                      | 8.69E-171 | 475       |
| ASM34480v1    | BAM91964.1_5943 | 56.2         | 317              | 139                  | 0                      | 7.96E-129 | 368       |
| ASM34480v1    | BAM92304.1_6283 | 52.9         | 329              | 154                  | 1                      | 4.26E-123 | 354       |
| ASM34480v1    | BAM93235.1_7214 | 47.7         | 321              | 168                  | 0                      | 1.34E-106 | 312       |

Table S1

|             |                 |      |     |     |   |           |     |
|-------------|-----------------|------|-----|-----|---|-----------|-----|
| ASM19274v1  | ADZ70905.1_2475 | 51.9 | 289 | 139 | 0 | 1.12E-104 | 306 |
| ASM211976v1 | ARP99846.1_2517 | 79.6 | 313 | 64  | 0 | 0         | 536 |
| ASM211976v1 | ARP98885.1_1419 | 75.2 | 294 | 73  | 0 | 5.42E-157 | 440 |
| ASM211976v1 | ARP99412.1_2017 | 72.7 | 319 | 84  | 2 | 1.03E-158 | 450 |
| ASM211976v1 | ARQ00167.1_2888 | 71.4 | 304 | 87  | 0 | 5.56E-164 | 458 |
| ASM211976v1 | ARP97840.1_228  | 69.9 | 306 | 92  | 0 | 2.3E-157  | 441 |
| ASM211976v1 | ARQ02181.1_5165 | 68.6 | 322 | 99  | 2 | 9.96E-161 | 449 |
| ASM211976v1 | ARP99484.1_2100 | 67.0 | 321 | 105 | 1 | 8.69E-149 | 419 |
| ASM211976v1 | ARQ00280.1_3024 | 66.2 | 302 | 102 | 0 | 6.22E-148 | 417 |
| ASM211976v1 | ARP99392.1_1993 | 65.3 | 323 | 108 | 2 | 1.1E-140  | 399 |
| ASM211976v1 | ARP98395.1_848  | 65.0 | 326 | 111 | 3 | 3.67E-142 | 402 |
| ASM211976v1 | ARP98001.1_417  | 64.5 | 324 | 114 | 1 | 1.56E-148 | 418 |
| ASM211976v1 | ARQ02450.1_5460 | 63.5 | 315 | 114 | 1 | 2.65E-150 | 424 |
| ASM211976v1 | ARQ00117.1_2827 | 63.2 | 299 | 107 | 3 | 1.62E-139 | 395 |
| ASM211976v1 | ARQ02236.1_5227 | 63.2 | 318 | 116 | 1 | 3.86E-152 | 428 |
| ASM211976v1 | ARQ01591.1_4486 | 62.8 | 304 | 113 | 0 | 6.69E-140 | 398 |
| ASM211976v1 | ARQ00364.1_3113 | 62.0 | 326 | 122 | 1 | 7.08E-147 | 414 |
| ASM211976v1 | ARQ01803.1_4738 | 60.3 | 310 | 123 | 0 | 1.48E-143 | 406 |
| ASM211976v1 | ARQ00280.1_3024 | 59.3 | 302 | 122 | 1 | 7.59E-126 | 362 |
| ASM211976v1 | ARP98858.1_1391 | 59.2 | 304 | 124 | 0 | 7.33E-139 | 394 |
| ASM211976v1 | ARQ00841.1_3650 | 58.9 | 319 | 131 | 0 | 2.69E-134 | 384 |
| ASM211976v1 | ARP98117.1_544  | 58.3 | 300 | 125 | 0 | 6.8E-123  | 353 |
| ASM211976v1 | ARQ02236.1_5227 | 57.8 | 320 | 131 | 3 | 1.5E-129  | 370 |
| ASM211976v1 | ARP98405.1_860  | 57.2 | 311 | 132 | 1 | 3.39E-129 | 369 |
| ASM211976v1 | ARQ02559.1_5583 | 57.1 | 319 | 136 | 1 | 6.82E-129 | 368 |
| ASM211976v1 | ARP97685.1_58   | 56.7 | 326 | 136 | 1 | 1.3E-145  | 411 |
| ASM211976v1 | ARQ02464.1_5476 | 56.7 | 312 | 135 | 0 | 2.53E-124 | 357 |
| ASM211976v1 | ARQ01810.1_4745 | 56.6 | 334 | 140 | 2 | 1.92E-126 | 363 |
| ASM211976v1 | ARQ00365.1_3114 | 56.2 | 297 | 129 | 1 | 4.77E-120 | 346 |
| ASM211976v1 | ARQ02066.1_5032 | 56.2 | 306 | 133 | 1 | 1.3E-121  | 350 |
| ASM211976v1 | ARP98405.1_860  | 56.2 | 331 | 139 | 2 | 2.58E-131 | 375 |
| ASM211976v1 | ARQ02126.1_5102 | 56.0 | 323 | 137 | 2 | 9.37E-131 | 373 |



Table S1

|             |                 |      |     |     |   |           |     |
|-------------|-----------------|------|-----|-----|---|-----------|-----|
| ASM211976v1 | ARQ00981.1_3805 | 54.8 | 292 | 130 | 2 | 1.53E-111 | 324 |
| ASM211976v1 | ARP98563.1_1048 | 54.7 | 298 | 134 | 1 | 3.86E-121 | 349 |
| ASM211976v1 | ARQ02236.1_5227 | 54.3 | 315 | 141 | 3 | 2.77E-123 | 355 |
| ASM211976v1 | ARQ01803.1_4738 | 54.2 | 319 | 145 | 1 | 1.16E-125 | 360 |
| ASM211976v1 | ARP99168.1_1733 | 54.1 | 320 | 145 | 1 | 2.39E-129 | 369 |
| ASM211976v1 | ARQ00365.1_3114 | 54.0 | 313 | 143 | 1 | 6.46E-121 | 348 |
| ASM211976v1 | ARQ01967.1_4916 | 53.9 | 317 | 145 | 1 | 2.75E-118 | 343 |
| ASM211976v1 | ARQ01182.1_4033 | 53.8 | 299 | 137 | 1 | 1.84E-111 | 324 |
| ASM211976v1 | ARP98405.1_860  | 53.6 | 330 | 148 | 2 | 2.32E-127 | 365 |
| ASM211976v1 | ARQ02041.1_5001 | 53.6 | 330 | 151 | 1 | 4.44E-127 | 364 |
| ASM211976v1 | ARQ00365.1_3114 | 53.6 | 289 | 129 | 3 | 6.53E-102 | 300 |
| ASM211976v1 | ARQ00365.1_3114 | 53.6 | 306 | 142 | 0 | 2.94E-113 | 328 |
| ASM211976v1 | ARQ00474.1_3237 | 52.4 | 315 | 149 | 1 | 8.09E-118 | 340 |
| ASM211976v1 | ARQ00111.1_2820 | 51.8 | 328 | 152 | 2 | 3.98E-119 | 345 |
| ASM211976v1 | ARQ00049.1_2747 | 51.7 | 325 | 152 | 1 | 3.49E-115 | 333 |
| ASM211976v1 | ARQ00981.1_3805 | 51.4 | 296 | 141 | 3 | 2.44E-105 | 308 |
| ASM211976v1 | ARQ02066.1_5032 | 51.3 | 302 | 144 | 2 | 4.25E-112 | 326 |
| ASM211976v1 | ARQ02236.1_5227 | 51.3 | 308 | 149 | 1 | 1.11E-116 | 338 |
| ASM211976v1 | ARQ00348.1_3096 | 50.8 | 297 | 146 | 0 | 3.07E-105 | 310 |
| ASM211976v1 | ARQ00075.1_2777 | 50.8 | 305 | 150 | 0 | 1.48E-115 | 335 |
| ASM211976v1 | ARQ02236.1_5227 | 50.3 | 332 | 158 | 3 | 7.08E-113 | 328 |
| ASM211976v1 | ARQ02236.1_5227 | 48.3 | 325 | 168 | 0 | 2.72E-116 | 337 |
| ASM211976v1 | ARQ02236.1_5227 | 48.3 | 321 | 165 | 1 | 3.01E-116 | 337 |
| ASM211976v1 | ARP98504.1_976  | 48.2 | 303 | 155 | 2 | 2.76E-95  | 286 |
| ASM211976v1 | ARQ00736.1_3532 | 47.7 | 323 | 165 | 2 | 7.02E-110 | 321 |
| ASM211976v1 | ARQ03119.1_4412 | 47.5 | 305 | 160 | 0 | 9.27E-99  | 292 |
| ASM211976v1 | ARQ02712.1_436  | 47.3 | 300 | 156 | 2 | 4.7E-93   | 277 |
| ASM211976v1 | ARP99168.1_1733 | 46.9 | 322 | 164 | 2 | 2.82E-103 | 303 |
| ASM211976v1 | ARQ02450.1_5460 | 46.9 | 318 | 166 | 3 | 1.17E-100 | 297 |
| ASM211976v1 | ARQ02126.1_5102 | 46.8 | 325 | 170 | 3 | 6.46E-107 | 313 |
| ASM211976v1 | ARP97693.1_66   | 46.7 | 317 | 164 | 2 | 1.32E-100 | 297 |
| ASM211976v1 | ARQ00075.1_2777 | 46.3 | 298 | 156 | 3 | 2.45E-93  | 278 |

Table S1

|             |                 |      |     |     |   |           |     |
|-------------|-----------------|------|-----|-----|---|-----------|-----|
| ASM211976v1 | ARQ00111.1_2820 | 46.2 | 318 | 169 | 2 | 1.17E-95  | 285 |
| ASM211976v1 | ARP97646.1_13   | 45.3 | 300 | 164 | 0 | 3.21E-88  | 266 |
| ASM211976v1 | ARQ02450.1_5460 | 44.9 | 305 | 167 | 1 | 4.63E-95  | 284 |
| ASM211976v1 | ARP99296.1_1886 | 43.9 | 319 | 176 | 2 | 4.08E-96  | 285 |
| ASM211976v1 | ARQ02126.1_5102 | 43.3 | 323 | 180 | 3 | 1.07E-92  | 276 |
| ASM211976v1 | ARQ01822.1_4757 | 43.2 | 303 | 169 | 2 | 7.34E-89  | 266 |
| ASM211976v1 | ARP99481.1_2097 | 42.9 | 317 | 175 | 3 | 1.03E-82  | 253 |
| ASM211976v1 | ARQ02450.1_5460 | 39.9 | 318 | 187 | 4 | 6.05E-77  | 237 |
| ASM211976v1 | ARP97824.1_211  | 37.3 | 308 | 188 | 2 | 2.43E-63  | 201 |
| ASM157984v1 | AMN41105.1_2640 | 80.1 | 322 | 63  | 1 | 0         | 513 |
| ASM157984v1 | AMN44660.1_6195 | 79.7 | 335 | 67  | 1 | 0         | 554 |
| ASM157984v1 | AMN44853.1_6388 | 78.1 | 329 | 72  | 0 | 0         | 509 |
| ASM157984v1 | AMN44679.1_6214 | 78.1 | 329 | 72  | 0 | 0         | 529 |
| ASM157984v1 | AMN45418.1_6953 | 74.2 | 325 | 84  | 0 | 0         | 512 |
| ASM157984v1 | AMN45417.1_6952 | 74.2 | 325 | 84  | 0 | 0         | 512 |
| ASM157984v1 | AMN45498.1_7033 | 73.6 | 326 | 86  | 0 | 0         | 505 |
| ASM157984v1 | AMN45497.1_7032 | 73.6 | 326 | 86  | 0 | 0         | 505 |
| ASM157984v1 | AMN39081.1_616  | 70.7 | 300 | 88  | 0 | 2.71E-150 | 423 |
| ASM157984v1 | AMN41292.1_2827 | 69.3 | 303 | 93  | 0 | 2.74E-157 | 441 |
| ASM157984v1 | AMN43264.1_4799 | 68.5 | 302 | 95  | 0 | 1.27E-157 | 441 |
| ASM157984v1 | AMN43565.1_5100 | 67.7 | 316 | 102 | 0 | 6.25E-152 | 427 |
| ASM157984v1 | AMN44369.1_5904 | 67.3 | 321 | 104 | 1 | 2.14E-155 | 436 |
| ASM157984v1 | AMN43897.1_5432 | 67.3 | 321 | 104 | 1 | 2.14E-155 | 436 |
| ASM157984v1 | AMN44552.1_6087 | 65.7 | 329 | 113 | 0 | 8.79E-154 | 432 |
| ASM157984v1 | AMN44387.1_5922 | 65.7 | 329 | 113 | 0 | 1.09E-155 | 437 |
| ASM157984v1 | AMN42088.1_3623 | 65.6 | 320 | 107 | 1 | 6.47E-158 | 442 |
| ASM157984v1 | AMN42620.1_4155 | 65.2 | 322 | 106 | 3 | 5.74E-153 | 429 |
| ASM157984v1 | AMN41292.1_2827 | 65.2 | 322 | 106 | 3 | 5.81E-153 | 429 |
| ASM157984v1 | AMN39298.1_833  | 65.1 | 301 | 103 | 2 | 6.12E-140 | 396 |
| ASM157984v1 | AMN42292.1_3827 | 64.3 | 305 | 108 | 1 | 9.08E-141 | 399 |
| ASM157984v1 | AMN41457.1_2992 | 64.3 | 305 | 108 | 1 | 9.22E-141 | 399 |
| ASM157984v1 | AMN39299.1_834  | 63.6 | 305 | 109 | 2 | 9.55E-141 | 399 |

Table S1

|             |                 |      |     |     |   |           |     |
|-------------|-----------------|------|-----|-----|---|-----------|-----|
| ASM157984v1 | AMN42082.1_3617 | 63.4 | 320 | 117 | 0 | 3.47E-140 | 397 |
| ASM157984v1 | AMN42083.1_3618 | 63.2 | 323 | 119 | 0 | 1.58E-145 | 410 |
| ASM157984v1 | AMN39857.1_1392 | 62.4 | 306 | 114 | 1 | 2.73E-132 | 377 |
| ASM157984v1 | AMN42802.1_4337 | 62.2 | 325 | 123 | 0 | 2.52E-146 | 413 |
| ASM157984v1 | AMN41822.1_3357 | 62.2 | 325 | 123 | 0 | 2.44E-146 | 413 |
| ASM157984v1 | AMN39858.1_1393 | 61.7 | 311 | 118 | 1 | 6.06E-135 | 384 |
| ASM157984v1 | AMN41455.1_2990 | 61.7 | 295 | 113 | 0 | 4.34E-138 | 392 |
| ASM157984v1 | AMN39623.1_1158 | 61.7 | 295 | 113 | 0 | 6.32E-138 | 391 |
| ASM157984v1 | AMN39337.1_872  | 61.1 | 301 | 116 | 1 | 2.56E-128 | 367 |
| ASM157984v1 | AMN45491.1_7026 | 60.5 | 324 | 126 | 1 | 8.32E-149 | 419 |
| ASM157984v1 | AMN44966.1_6501 | 60.5 | 324 | 126 | 1 | 8.4E-149  | 419 |
| ASM157984v1 | AMN40814.1_2349 | 60.5 | 311 | 121 | 1 | 7.99E-139 | 394 |
| ASM157984v1 | AMN40380.1_1915 | 60.5 | 311 | 121 | 1 | 8.57E-139 | 394 |
| ASM157984v1 | AMN43852.1_5387 | 60.3 | 315 | 124 | 1 | 4.15E-139 | 394 |
| ASM157984v1 | AMN45310.1_6845 | 60.1 | 308 | 123 | 0 | 5.86E-145 | 410 |
| ASM157984v1 | AMN42826.1_4361 | 60.1 | 308 | 123 | 0 | 1.01E-144 | 409 |
| ASM157984v1 | AMN42802.1_4337 | 59.2 | 326 | 133 | 0 | 9E-142    | 401 |
| ASM157984v1 | AMN41229.1_2764 | 58.5 | 299 | 123 | 1 | 3.55E-119 | 344 |
| ASM157984v1 | AMN42802.1_4337 | 58.5 | 323 | 134 | 0 | 9.83E-136 | 386 |
| ASM157984v1 | AMN45310.1_6845 | 58.4 | 305 | 127 | 0 | 2.57E-128 | 367 |
| ASM157984v1 | AMN41130.1_2665 | 58.0 | 324 | 131 | 3 | 1.18E-126 | 363 |
| ASM157984v1 | AMN39497.1_1032 | 58.0 | 324 | 131 | 3 | 2.44E-134 | 382 |
| ASM157984v1 | AMN43810.1_5345 | 57.9 | 302 | 127 | 0 | 2.11E-114 | 332 |
| ASM157984v1 | AMN41488.1_3023 | 57.9 | 304 | 128 | 0 | 3.89E-135 | 384 |
| ASM157984v1 | AMN40100.1_1635 | 57.9 | 304 | 128 | 0 | 4.85E-135 | 384 |
| ASM157984v1 | AMN44853.1_6388 | 57.8 | 320 | 132 | 1 | 6.36E-129 | 369 |
| ASM157984v1 | AMN40138.1_1673 | 57.8 | 320 | 132 | 2 | 2.71E-135 | 385 |
| ASM157984v1 | AMN44552.1_6087 | 57.7 | 319 | 132 | 2 | 4.02E-125 | 359 |
| ASM157984v1 | AMN38593.1_128  | 57.1 | 308 | 132 | 0 | 5.19E-132 | 377 |
| ASM157984v1 | AMN39299.1_834  | 57.1 | 308 | 128 | 1 | 2.06E-121 | 350 |
| ASM157984v1 | AMN43390.1_4925 | 57.0 | 298 | 127 | 1 | 1.92E-119 | 345 |
| ASM157984v1 | AMN44922.1_6457 | 56.7 | 300 | 130 | 0 | 9.21E-126 | 360 |

Table S1

|             |                 |      |     |     |   |           |     |
|-------------|-----------------|------|-----|-----|---|-----------|-----|
| ASM157984v1 | AMN40250.1_1785 | 56.6 | 304 | 127 | 1 | 6.5E-122  | 351 |
| ASM157984v1 | AMN41822.1_3357 | 56.5 | 322 | 138 | 2 | 2.38E-123 | 355 |
| ASM157984v1 | AMN41885.1_3420 | 56.5 | 322 | 139 | 1 | 5.49E-121 | 349 |
| ASM157984v1 | AMN41822.1_3357 | 56.4 | 314 | 137 | 0 | 1.05E-125 | 361 |
| ASM157984v1 | AMN39836.1_1371 | 56.3 | 302 | 131 | 1 | 2.92E-124 | 357 |
| ASM157984v1 | AMN41822.1_3357 | 56.3 | 318 | 137 | 2 | 1.69E-130 | 373 |
| ASM157984v1 | AMN42361.1_3896 | 56.3 | 304 | 132 | 1 | 6.69E-126 | 361 |
| ASM157984v1 | AMN40864.1_2399 | 56.2 | 297 | 130 | 0 | 5.11E-115 | 333 |
| ASM157984v1 | AMN41859.1_3394 | 56.1 | 301 | 131 | 1 | 5.19E-121 | 349 |
| ASM157984v1 | AMN39037.1_572  | 56.1 | 303 | 132 | 1 | 4.48E-125 | 359 |
| ASM157984v1 | AMN43514.1_5049 | 56.0 | 316 | 135 | 2 | 4.27E-117 | 338 |
| ASM157984v1 | AMN44921.1_6456 | 56.0 | 316 | 138 | 1 | 1.77E-128 | 367 |
| ASM157984v1 | AMN41394.1_2929 | 56.0 | 318 | 140 | 0 | 2.51E-136 | 387 |
| ASM157984v1 | AMN41041.1_2576 | 56.0 | 318 | 140 | 0 | 1.58E-131 | 375 |
| ASM157984v1 | AMN43389.1_4924 | 55.6 | 315 | 136 | 2 | 6.54E-120 | 346 |
| ASM157984v1 | AMN41040.1_2575 | 55.3 | 309 | 135 | 1 | 1.95E-124 | 357 |
| ASM157984v1 | AMN42802.1_4337 | 55.2 | 326 | 145 | 1 | 2.73E-131 | 375 |
| ASM157984v1 | AMN40364.1_1899 | 55.2 | 326 | 145 | 1 | 4.54E-129 | 369 |
| ASM157984v1 | AMN41040.1_2575 | 55.1 | 214 | 96  | 0 | 2.77E-88  | 261 |
| ASM157984v1 | AMN40540.1_2075 | 55.1 | 316 | 141 | 1 | 1.37E-126 | 362 |
| ASM157984v1 | AMN40100.1_1635 | 54.9 | 304 | 137 | 0 | 2.87E-126 | 362 |
| ASM157984v1 | AMN38592.1_127  | 54.8 | 332 | 145 | 1 | 2.81E-133 | 380 |
| ASM157984v1 | AMN38644.1_179  | 54.8 | 301 | 136 | 0 | 4.14E-114 | 331 |
| ASM157984v1 | AMN39129.1_664  | 54.7 | 322 | 146 | 0 | 5.66E-121 | 348 |
| ASM157984v1 | AMN41773.1_3308 | 54.7 | 322 | 143 | 2 | 1.12E-122 | 353 |
| ASM157984v1 | AMN39809.1_1344 | 54.6 | 326 | 144 | 1 | 7.57E-123 | 353 |
| ASM157984v1 | AMN44346.1_5881 | 54.5 | 321 | 142 | 2 | 4.28E-124 | 357 |
| ASM157984v1 | AMN40761.1_2296 | 54.5 | 321 | 142 | 2 | 4.08E-124 | 357 |
| ASM157984v1 | AMN40792.1_2327 | 54.2 | 312 | 141 | 2 | 5.6E-115  | 333 |
| ASM157984v1 | AMN40792.1_2327 | 54.1 | 320 | 144 | 2 | 1.23E-119 | 345 |
| ASM157984v1 | AMN41773.1_3308 | 54.0 | 322 | 143 | 2 | 1.02E-125 | 361 |
| ASM157984v1 | AMN39418.1_953  | 54.0 | 302 | 137 | 2 | 7.72E-113 | 328 |

Table S1

|             |                 |      |     |     |   |           |     |
|-------------|-----------------|------|-----|-----|---|-----------|-----|
| ASM157984v1 | AMN41662.1_3197 | 53.9 | 293 | 135 | 0 | 1.31E-116 | 336 |
| ASM157984v1 | AMN42802.1_4337 | 53.9 | 323 | 147 | 1 | 3.27E-126 | 362 |
| ASM157984v1 | AMN41586.1_3121 | 53.8 | 327 | 149 | 2 | 6.51E-116 | 336 |
| ASM157984v1 | AMN41856.1_3391 | 53.8 | 305 | 139 | 1 | 1.05E-115 | 335 |
| ASM157984v1 | AMN39809.1_1344 | 53.7 | 300 | 139 | 0 | 9.94E-108 | 315 |
| ASM157984v1 | AMN40138.1_1673 | 53.4 | 324 | 151 | 0 | 3.76E-124 | 357 |
| ASM157984v1 | AMN44952.1_6487 | 53.4 | 313 | 145 | 1 | 1.2E-117  | 340 |
| ASM157984v1 | AMN42861.1_4396 | 53.4 | 313 | 145 | 1 | 1.2E-117  | 340 |
| ASM157984v1 | AMN40381.1_1916 | 53.3 | 300 | 140 | 0 | 1.62E-119 | 345 |
| ASM157984v1 | AMN45416.1_6951 | 53.3 | 319 | 149 | 0 | 3.9E-120  | 347 |
| ASM157984v1 | AMN41662.1_3197 | 53.3 | 319 | 148 | 1 | 1.21E-120 | 348 |
| ASM157984v1 | AMN41267.1_2802 | 53.3 | 319 | 149 | 0 | 6.82E-123 | 354 |
| ASM157984v1 | AMN40935.1_2470 | 53.3 | 291 | 136 | 0 | 2.35E-113 | 330 |
| ASM157984v1 | AMN43567.1_5102 | 53.2 | 310 | 144 | 1 | 1.1E-117  | 342 |
| ASM157984v1 | AMN43839.1_5374 | 53.1 | 318 | 149 | 0 | 7.57E-116 | 335 |
| ASM157984v1 | AMN43823.1_5358 | 52.9 | 327 | 151 | 2 | 7.52E-115 | 333 |
| ASM157984v1 | AMN39510.1_1045 | 52.8 | 305 | 143 | 1 | 1.09E-117 | 340 |
| ASM157984v1 | AMN44609.1_6144 | 52.8 | 324 | 151 | 1 | 6.17E-124 | 357 |
| ASM157984v1 | AMN41728.1_3263 | 52.8 | 324 | 151 | 1 | 6E-118    | 341 |
| ASM157984v1 | AMN41822.1_3357 | 52.8 | 324 | 153 | 0 | 7.68E-121 | 348 |
| ASM157984v1 | AMN41488.1_3023 | 52.7 | 319 | 147 | 1 | 6.41E-121 | 349 |
| ASM157984v1 | AMN45418.1_6953 | 52.6 | 310 | 144 | 2 | 1.58E-111 | 325 |
| ASM157984v1 | AMN40381.1_1916 | 52.5 | 297 | 141 | 0 | 5.32E-116 | 336 |
| ASM157984v1 | AMN41394.1_2929 | 52.5 | 320 | 152 | 0 | 1.89E-121 | 350 |
| ASM157984v1 | AMN41396.1_2931 | 52.5 | 263 | 123 | 2 | 4.39E-97  | 285 |
| ASM157984v1 | AMN42545.1_4080 | 52.4 | 315 | 147 | 2 | 2.34E-113 | 329 |
| ASM157984v1 | AMN42646.1_4181 | 52.4 | 319 | 149 | 2 | 1.34E-111 | 326 |
| ASM157984v1 | AMN39299.1_834  | 52.3 | 302 | 144 | 0 | 3.02E-111 | 323 |
| ASM157984v1 | AMN39348.1_883  | 52.2 | 297 | 139 | 3 | 4.32E-106 | 310 |
| ASM157984v1 | AMN42083.1_3618 | 52.2 | 301 | 144 | 0 | 4.91E-112 | 326 |
| ASM157984v1 | AMN43364.1_4899 | 52.1 | 303 | 144 | 1 | 1.25E-109 | 319 |
| ASM157984v1 | AMN41039.1_2574 | 52.1 | 303 | 144 | 1 | 1.24E-109 | 319 |

Table S1

|             |                 |      |     |     |   |           |     |
|-------------|-----------------|------|-----|-----|---|-----------|-----|
| ASM157984v1 | AMN43183.1_4718 | 52.1 | 328 | 154 | 2 | 9.63E-120 | 345 |
| ASM157984v1 | AMN39036.1_571  | 52.1 | 328 | 154 | 2 | 1.86E-112 | 327 |
| ASM157984v1 | AMN41445.1_2980 | 52.0 | 298 | 143 | 0 | 1.02E-111 | 325 |
| ASM157984v1 | AMN45225.1_6760 | 51.8 | 301 | 144 | 1 | 2.47E-99  | 293 |
| ASM157984v1 | AMN39007.1_542  | 51.8 | 301 | 144 | 1 | 2.73E-106 | 311 |
| ASM157984v1 | AMN41394.1_2929 | 51.8 | 313 | 148 | 2 | 1.18E-113 | 330 |
| ASM157984v1 | AMN42450.1_3985 | 51.7 | 302 | 146 | 0 | 3.45E-112 | 328 |
| ASM157984v1 | AMN42147.1_3682 | 51.7 | 302 | 145 | 1 | 1.42E-110 | 322 |
| ASM157984v1 | AMN39966.1_1501 | 51.7 | 302 | 145 | 1 | 6.93E-102 | 300 |
| ASM157984v1 | AMN39592.1_1127 | 51.7 | 302 | 146 | 0 | 3.13E-112 | 328 |
| ASM157984v1 | AMN43568.1_5103 | 51.5 | 328 | 158 | 1 | 2.91E-114 | 333 |
| ASM157984v1 | AMN43536.1_5071 | 51.5 | 332 | 151 | 4 | 3.04E-106 | 311 |
| ASM157984v1 | AMN39534.1_1069 | 51.5 | 332 | 151 | 4 | 2.4E-103  | 304 |
| ASM157984v1 | AMN42424.1_3959 | 51.5 | 305 | 146 | 1 | 1.68E-113 | 330 |
| ASM157984v1 | AMN44921.1_6456 | 51.4 | 317 | 152 | 2 | 6.74E-120 | 346 |
| ASM157984v1 | AMN42646.1_4181 | 51.4 | 325 | 149 | 2 | 4.86E-114 | 332 |
| ASM157984v1 | AMN39243.1_778  | 51.4 | 325 | 149 | 2 | 4.34E-114 | 332 |
| ASM157984v1 | AMN43546.1_5081 | 51.2 | 324 | 155 | 3 | 4.61E-109 | 318 |
| ASM157984v1 | AMN41061.1_2596 | 51.2 | 324 | 155 | 3 | 4.69E-109 | 318 |
| ASM157984v1 | AMN42083.1_3618 | 51.2 | 299 | 146 | 0 | 8.4E-112  | 325 |
| ASM157984v1 | AMN44346.1_5881 | 51.1 | 307 | 148 | 1 | 8.87E-120 | 345 |
| ASM157984v1 | AMN43897.1_5432 | 51.1 | 313 | 153 | 0 | 5.52E-114 | 331 |
| ASM157984v1 | AMN38592.1_127  | 51.1 | 323 | 154 | 2 | 3.85E-116 | 337 |
| ASM157984v1 | AMN40142.1_1677 | 51.1 | 325 | 159 | 0 | 9.09E-120 | 345 |
| ASM157984v1 | AMN43364.1_4899 | 50.9 | 320 | 155 | 2 | 8.1E-108  | 315 |
| ASM157984v1 | AMN40935.1_2470 | 50.9 | 291 | 143 | 0 | 5.31E-107 | 313 |
| ASM157984v1 | AMN42332.1_3867 | 50.9 | 293 | 139 | 2 | 9.43E-99  | 291 |
| ASM157984v1 | AMN41856.1_3391 | 50.8 | 303 | 149 | 0 | 6.52E-110 | 320 |
| ASM157984v1 | AMN39560.1_1095 | 50.8 | 305 | 149 | 1 | 3.12E-104 | 306 |
| ASM157984v1 | AMN43823.1_5358 | 50.8 | 327 | 161 | 0 | 1.18E-114 | 333 |
| ASM157984v1 | AMN42618.1_4153 | 50.8 | 327 | 161 | 0 | 1.2E-107  | 315 |
| ASM157984v1 | AMN42333.1_3868 | 50.7 | 296 | 141 | 2 | 8.74E-100 | 294 |

Table S1

|             |                 |      |     |     |   |           |     |
|-------------|-----------------|------|-----|-----|---|-----------|-----|
| ASM157984v1 | AMN40100.1_1635 | 50.6 | 312 | 149 | 4 | 1.82E-102 | 302 |
| ASM157984v1 | AMN42783.1_4318 | 50.6 | 318 | 154 | 2 | 8.36E-104 | 306 |
| ASM157984v1 | AMN44737.1_6272 | 50.6 | 330 | 158 | 3 | 3.26E-116 | 337 |
| ASM157984v1 | AMN44909.1_6444 | 50.5 | 307 | 151 | 1 | 8.74E-111 | 322 |
| ASM157984v1 | AMN40891.1_2426 | 50.3 | 294 | 146 | 0 | 2.95E-102 | 301 |
| ASM157984v1 | AMN43364.1_4899 | 50.3 | 322 | 156 | 2 | 1.5E-102  | 301 |
| ASM157984v1 | AMN41662.1_3197 | 50.2 | 319 | 158 | 1 | 2.79E-116 | 337 |
| ASM157984v1 | AMN40891.1_2426 | 50.0 | 298 | 149 | 0 | 1.3E-102  | 302 |
| ASM157984v1 | AMN43248.1_4783 | 50.0 | 294 | 146 | 1 | 4.42E-111 | 323 |
| ASM157984v1 | AMN43246.1_4781 | 50.0 | 298 | 148 | 1 | 7.77E-113 | 328 |
| ASM157984v1 | AMN38699.1_234  | 49.8 | 325 | 162 | 1 | 2.02E-102 | 301 |
| ASM157984v1 | AMN41394.1_2929 | 49.8 | 315 | 157 | 1 | 6.48E-120 | 346 |
| ASM157984v1 | AMN41517.1_3052 | 49.8 | 297 | 148 | 1 | 1.01E-100 | 297 |
| ASM157984v1 | AMN42361.1_3896 | 49.7 | 304 | 152 | 1 | 1.53E-110 | 322 |
| ASM157984v1 | AMN38644.1_179  | 49.5 | 301 | 152 | 0 | 1.01E-109 | 320 |
| ASM157984v1 | AMN39037.1_572  | 49.5 | 297 | 148 | 1 | 3.86E-105 | 308 |
| ASM157984v1 | AMN40300.1_1835 | 49.4 | 326 | 164 | 1 | 4.04E-112 | 326 |
| ASM157984v1 | AMN43183.1_4718 | 49.4 | 326 | 161 | 2 | 4.03E-112 | 326 |
| ASM157984v1 | AMN41858.1_3393 | 49.4 | 322 | 162 | 1 | 2.18E-105 | 309 |
| ASM157984v1 | AMN38788.1_323  | 49.4 | 322 | 162 | 1 | 1.36E-106 | 312 |
| ASM157984v1 | AMN43183.1_4718 | 49.4 | 320 | 160 | 2 | 1.48E-109 | 320 |
| ASM157984v1 | AMN43841.1_5376 | 49.2 | 327 | 160 | 3 | 9.13E-112 | 325 |
| ASM157984v1 | AMN40387.1_1922 | 49.2 | 327 | 160 | 3 | 9.02E-112 | 325 |
| ASM157984v1 | AMN44488.1_6023 | 48.9 | 321 | 159 | 2 | 1.51E-114 | 332 |
| ASM157984v1 | AMN39283.1_818  | 48.9 | 321 | 159 | 2 | 1.51E-114 | 332 |
| ASM157984v1 | AMN38699.1_234  | 48.8 | 301 | 152 | 2 | 1.18E-95  | 284 |
| ASM157984v1 | AMN39348.1_883  | 48.8 | 295 | 150 | 1 | 4.84E-96  | 285 |
| ASM157984v1 | AMN44555.1_6090 | 48.6 | 296 | 152 | 0 | 2.2E-104  | 306 |
| ASM157984v1 | AMN39786.1_1321 | 48.6 | 296 | 152 | 0 | 2.14E-104 | 306 |
| ASM157984v1 | AMN41394.1_2929 | 48.6 | 321 | 163 | 1 | 1.4E-111  | 325 |
| ASM157984v1 | AMN44283.1_5818 | 48.2 | 330 | 167 | 1 | 9.65E-103 | 303 |
| ASM157984v1 | AMN44660.1_6195 | 48.1 | 289 | 150 | 0 | 8.87E-99  | 294 |

Table S1

|             |                 |      |     |     |   |           |     |
|-------------|-----------------|------|-----|-----|---|-----------|-----|
| ASM157984v1 | AMN41445.1_2980 | 48.0 | 300 | 154 | 2 | 2.12E-100 | 296 |
| ASM157984v1 | AMN38593.1_128  | 47.9 | 307 | 157 | 2 | 3.54E-108 | 317 |
| ASM157984v1 | AMN39348.1_883  | 47.8 | 299 | 155 | 1 | 3.75E-101 | 298 |
| ASM157984v1 | AMN43248.1_4783 | 47.4 | 293 | 154 | 0 | 6.51E-101 | 298 |
| ASM157984v1 | AMN43823.1_5358 | 47.2 | 326 | 170 | 1 | 2.78E-104 | 306 |
| ASM157984v1 | AMN43565.1_5100 | 47.1 | 323 | 167 | 1 | 7.6E-109  | 318 |
| ASM157984v1 | AMN38644.1_179  | 46.9 | 294 | 156 | 0 | 6.15E-91  | 272 |
| ASM157984v1 | AMN39786.1_1321 | 46.9 | 320 | 167 | 2 | 2.34E-92  | 276 |
| ASM157984v1 | AMN44623.1_6158 | 46.9 | 303 | 161 | 0 | 9.5E-95   | 282 |
| ASM157984v1 | AMN43536.1_5071 | 46.8 | 329 | 167 | 5 | 2.36E-95  | 283 |
| ASM157984v1 | AMN39348.1_883  | 46.7 | 330 | 173 | 2 | 9.41E-98  | 290 |
| ASM157984v1 | AMN44283.1_5818 | 46.6 | 326 | 166 | 2 | 1.3E-100  | 297 |
| ASM157984v1 | AMN40143.1_1678 | 46.4 | 304 | 161 | 1 | 1.32E-99  | 294 |
| ASM157984v1 | AMN43841.1_5376 | 46.3 | 324 | 163 | 5 | 1.39E-107 | 314 |
| ASM157984v1 | AMN41935.1_3470 | 46.2 | 314 | 168 | 1 | 1.57E-94  | 282 |
| ASM157984v1 | AMN39037.1_572  | 46.1 | 297 | 159 | 1 | 2.31E-99  | 293 |
| ASM157984v1 | AMN41935.1_3470 | 45.9 | 296 | 160 | 0 | 3.09E-94  | 280 |
| ASM157984v1 | AMN40144.1_1679 | 45.7 | 317 | 170 | 1 | 2.09E-100 | 296 |
| ASM157984v1 | AMN39302.1_837  | 45.7 | 300 | 161 | 1 | 6.96E-91  | 271 |
| ASM157984v1 | AMN39470.1_1005 | 45.5 | 299 | 161 | 1 | 6.7E-94   | 279 |
| ASM157984v1 | AMN45417.1_6952 | 45.3 | 311 | 168 | 1 | 1.57E-99  | 294 |
| ASM157984v1 | AMN43183.1_4718 | 45.3 | 320 | 173 | 2 | 8.88E-103 | 302 |
| ASM157984v1 | AMN42783.1_4318 | 45.3 | 316 | 173 | 0 | 7.16E-90  | 271 |
| ASM157984v1 | AMN41591.1_3126 | 45.0 | 320 | 172 | 2 | 2.42E-86  | 261 |
| ASM157984v1 | AMN40896.1_2431 | 45.0 | 320 | 172 | 2 | 4.99E-96  | 286 |
| ASM157984v1 | AMN44322.1_5857 | 44.9 | 305 | 164 | 4 | 2.6E-90   | 270 |
| ASM157984v1 | AMN44001.1_5536 | 44.5 | 330 | 175 | 3 | 1.77E-93  | 280 |
| ASM157984v1 | AMN39351.1_886  | 44.5 | 290 | 161 | 0 | 1.48E-92  | 276 |
| ASM157984v1 | AMN39130.1_665  | 44.5 | 290 | 161 | 0 | 4.59E-82  | 249 |
| ASM157984v1 | AMN44756.1_6291 | 44.5 | 290 | 160 | 1 | 1.54E-89  | 267 |
| ASM157984v1 | AMN39786.1_1321 | 44.2 | 301 | 164 | 1 | 1.83E-87  | 266 |
| ASM157984v1 | AMN39302.1_837  | 44.1 | 311 | 172 | 2 | 1.29E-96  | 286 |



Table S1

|             |                 |      |     |     |   |           |     |
|-------------|-----------------|------|-----|-----|---|-----------|-----|
| ASM157984v1 | AMN44278.1_5813 | 43.7 | 325 | 182 | 1 | 4.46E-91  | 273 |
| ASM157984v1 | AMN42077.1_3612 | 43.7 | 325 | 182 | 1 | 2.44E-96  | 286 |
| ASM157984v1 | AMN39302.1_837  | 43.5 | 322 | 176 | 2 | 5.87E-92  | 275 |
| ASM157984v1 | AMN38614.1_149  | 43.3 | 300 | 169 | 1 | 3.53E-85  | 257 |
| ASM157984v1 | AMN39592.1_1127 | 43.1 | 313 | 177 | 1 | 1.51E-91  | 275 |
| ASM157984v1 | AMN39007.1_542  | 43.0 | 305 | 173 | 1 | 1.73E-85  | 258 |
| ASM157984v1 | AMN43536.1_5071 | 42.9 | 333 | 181 | 2 | 2.47E-90  | 271 |
| ASM157984v1 | AMN41496.1_3031 | 42.6 | 312 | 178 | 1 | 1.73E-84  | 256 |
| ASM157984v1 | AMN44649.1_6184 | 42.6 | 317 | 180 | 1 | 4E-89     | 268 |
| ASM157984v1 | AMN44481.1_6016 | 42.6 | 317 | 180 | 1 | 4.29E-89  | 268 |
| ASM157984v1 | AMN42783.1_4318 | 42.4 | 302 | 174 | 0 | 3.36E-80  | 246 |
| ASM157984v1 | AMN39308.1_843  | 42.3 | 333 | 182 | 4 | 4.52E-86  | 260 |
| ASM157984v1 | AMN41520.1_3055 | 42.2 | 320 | 184 | 1 | 1.58E-91  | 274 |
| ASM157984v1 | AMN39966.1_1501 | 42.1 | 299 | 172 | 1 | 3.63E-84  | 255 |
| ASM157984v1 | AMN44187.1_5722 | 41.8 | 311 | 178 | 1 | 1.17E-81  | 248 |
| ASM157984v1 | AMN39858.1_1393 | 41.6 | 303 | 176 | 1 | 3.01E-84  | 255 |
| ASM157984v1 | AMN42350.1_3885 | 41.3 | 298 | 174 | 1 | 3.05E-81  | 247 |
| ASM157984v1 | AMN44481.1_6016 | 39.0 | 246 | 150 | 0 | 1.4E-63   | 199 |
| ASM157984v1 | AMN39434.1_969  | 38.7 | 313 | 187 | 5 | 1.35E-64  | 204 |
| ASM194194v1 | APT55936.1_234  | 52.7 | 300 | 140 | 1 | 1.73E-106 | 312 |
| ASM194194v1 | APT56580.1_1010 | 39.2 | 337 | 189 | 7 | 1.19E-69  | 218 |
| ASM696v1    | CAC46347.1_1774 | 38.3 | 290 | 179 | 0 | 4E-76     | 234 |
| ASM151435v1 | ALX85037.1_3677 | 45.2 | 323 | 177 | 0 | 7.98E-100 | 295 |
| ASM197164v1 | APX75522.1_2381 | 45.5 | 314 | 162 | 1 | 7.05E-90  | 269 |
| ASM197164v1 | APX75522.1_2381 | 42.9 | 303 | 171 | 2 | 6.12E-74  | 229 |
| ASM16583v1  | ADP15522.1_2160 | 45.0 | 318 | 171 | 3 | 1.09E-90  | 272 |
| ASM16583v1  | ADP15522.1_2160 | 43.4 | 316 | 174 | 3 | 2.09E-87  | 263 |
| ASM16583v1  | ADP17649.1_4287 | 43.3 | 321 | 182 | 0 | 1.4E-91   | 273 |
| ASM16583v1  | ADP15892.1_2530 | 40.6 | 310 | 183 | 1 | 2.07E-73  | 228 |
| ASM21991v3  | AFK61589.1_851  | 47.4 | 302 | 158 | 1 | 7.26E-94  | 280 |
| ASM21991v3  | AFK64071.1_3333 | 40.2 | 323 | 185 | 4 | 1.46E-76  | 236 |
| ASM17901v2  | ADU99363.1_1576 | 51.9 | 316 | 148 | 2 | 4.51E-110 | 320 |

Table S1

|             |                 |      |     |     |   |           |     |
|-------------|-----------------|------|-----|-----|---|-----------|-----|
| ASM17901v2  | ADV01228.1_3440 | 47.8 | 301 | 155 | 2 | 1.1E-98   | 292 |
| ASM17901v2  | ADU97812.1_25   | 42.1 | 302 | 172 | 3 | 5.13E-75  | 231 |
| ASM17901v2  | ADV00940.1_3152 | 40.9 | 303 | 176 | 3 | 1.38E-77  | 238 |
| ASM17901v2  | ADU98330.1_543  | 39.3 | 303 | 179 | 4 | 2.52E-76  | 235 |
| ASM167670v1 | ANN65508.1_726  | 47.2 | 318 | 165 | 1 | 3.13E-108 | 316 |
| ASM167670v1 | ANN66288.1_1639 | 44.4 | 297 | 162 | 3 | 2.21E-79  | 242 |
| ASM167670v1 | ANN67162.1_2665 | 42.7 | 300 | 170 | 2 | 5.12E-87  | 262 |
| ASM167670v1 | ANN66091.1_1407 | 41.9 | 298 | 173 | 0 | 1.49E-83  | 253 |
| ASM167670v1 | ANN68175.1_3836 | 39.6 | 298 | 173 | 4 | 3.96E-69  | 216 |
| ASM19567v1  | CAE34693.1_4322 | 39.3 | 313 | 183 | 3 | 2.76E-78  | 239 |
| ASM167672v1 | ANN78731.1_3527 | 48.8 | 322 | 157 | 5 | 2.61E-93  | 278 |
| ASM167672v1 | ANN78365.1_3109 | 47.8 | 324 | 166 | 2 | 1.91E-103 | 304 |
| ASM167672v1 | ANN75934.1_251  | 45.0 | 311 | 171 | 0 | 2.55E-94  | 281 |
| ASM167672v1 | ANN78973.1_3814 | 43.9 | 321 | 178 | 2 | 2.31E-90  | 271 |
| ASM167672v1 | ANN75934.1_251  | 43.7 | 323 | 180 | 2 | 2.66E-90  | 271 |
| ASM167672v1 | ANN78416.1_3170 | 41.5 | 316 | 180 | 2 | 4.55E-81  | 247 |
| ASM167672v1 | ANN78627.1_3412 | 40.9 | 303 | 175 | 4 | 3.76E-71  | 221 |
| ASM167672v1 | ANN76139.1_497  | 38.5 | 325 | 193 | 5 | 3.43E-69  | 217 |
| ASM211966v1 | ARP96556.1_4067 | 47.3 | 313 | 163 | 2 | 8.32E-101 | 297 |
| ASM211966v1 | ARP95149.1_2498 | 43.9 | 321 | 178 | 2 | 3.99E-94  | 280 |
| ASM211966v1 | ARP96556.1_4067 | 43.9 | 303 | 170 | 0 | 1.37E-87  | 263 |
| ASM211966v1 | ARP96333.1_3814 | 43.7 | 318 | 173 | 2 | 2.73E-91  | 273 |
| ASM211966v1 | ARP95536.1_2920 | 43.6 | 305 | 167 | 3 | 3.77E-86  | 260 |
| ASM211966v1 | ARP96556.1_4067 | 42.9 | 308 | 174 | 2 | 9.11E-83  | 251 |
| ASM211966v1 | ARP96556.1_4067 | 42.0 | 319 | 179 | 2 | 6.05E-76  | 234 |
| ASM107827v1 | AKQ57903.1_4541 | 50.5 | 295 | 146 | 0 | 9.24E-110 | 320 |
| ASM107827v1 | AKQ56159.1_2797 | 46.6 | 326 | 170 | 3 | 3.25E-88  | 265 |
| ASM107827v1 | AKQ54555.1_1193 | 46.0 | 313 | 169 | 0 | 3.42E-98  | 291 |
| ASM107827v1 | AKQ54555.1_1193 | 40.8 | 321 | 185 | 4 | 5.89E-83  | 252 |
| ASM107827v1 | AKQ54555.1_1193 | 40.2 | 331 | 195 | 3 | 1.76E-71  | 223 |
| ASM19569v1  | CAE37573.1_2271 | 45.2 | 299 | 163 | 1 | 1.09E-85  | 259 |
| ASM19359v3  | AIW92810.1_2200 | 56.2 | 299 | 131 | 0 | 5.78E-126 | 362 |

Table S1

|             |                 |      |     |     |   |           |     |
|-------------|-----------------|------|-----|-----|---|-----------|-----|
| ASM19359v3  | AIW92089.1_1479 | 41.9 | 310 | 179 | 1 | 2.6E-86   | 260 |
| ASM6720v1   | CAP41074.1_743  | 42.4 | 297 | 169 | 2 | 4.28E-81  | 246 |
| ASM6720v1   | CAP43764.1_3433 | 41.7 | 302 | 176 | 0 | 1.27E-84  | 256 |
| ASM169818v1 | ANY17866.1_3817 | 45.6 | 296 | 161 | 0 | 3.15E-96  | 285 |
| ASM169818v1 | ANY16017.1_1760 | 45.6 | 316 | 171 | 1 | 9.83E-99  | 291 |
| ASM170429v1 | AOB33652.1_2246 | 54.8 | 310 | 140 | 0 | 2.48E-117 | 339 |
| ASM170429v1 | AOB33906.1_3936 | 51.7 | 300 | 144 | 1 | 9.21E-102 | 300 |
| ASM170429v1 | AOB33882.1_3763 | 48.3 | 298 | 153 | 1 | 5.1E-99   | 293 |
| ASM170429v1 | AOB31346.1_2365 | 48.3 | 315 | 160 | 3 | 2.95E-99  | 293 |
| ASM170429v1 | AOB31531.1_2591 | 47.1 | 329 | 169 | 3 | 9.05E-101 | 297 |
| ASM170429v1 | AOB33469.1_1240 | 46.0 | 291 | 156 | 1 | 8.41E-84  | 253 |
| ASM170429v1 | AOB33748.1_2738 | 40.5 | 301 | 179 | 0 | 1.36E-72  | 225 |
| H044680328  | SAI68954.1_1543 | 47.8 | 312 | 161 | 2 | 2.55E-99  | 293 |
| ASM83230v1  | AJG23237.1_5822 | 48.7 | 304 | 156 | 0 | 3.27E-106 | 311 |
| ASM83230v1  | AJG23237.1_5822 | 46.8 | 299 | 159 | 0 | 2.13E-103 | 304 |
| ASM83230v1  | AJG23237.1_5822 | 44.6 | 303 | 165 | 3 | 8.55E-85  | 257 |
| ASM83230v1  | AJG24295.1_6880 | 44.3 | 300 | 163 | 3 | 1.6E-80   | 245 |
| ASM83230v1  | AJG24295.1_6880 | 44.2 | 283 | 152 | 3 | 3.03E-74  | 229 |
| ASM83230v1  | AJG24295.1_6880 | 42.7 | 300 | 168 | 3 | 1.03E-77  | 238 |
| ASM128146v1 | ALD93439.1_4179 | 45.8 | 299 | 161 | 1 | 2.17E-82  | 251 |
| ASM128146v1 | ALD92916.1_3656 | 42.6 | 296 | 165 | 2 | 1.1E-76   | 235 |
| ASM128146v1 | ALD92916.1_3656 | 37.4 | 297 | 185 | 1 | 4.44E-59  | 190 |
| ASM19601v1  | ABF07709.1_848  | 44.9 | 325 | 176 | 3 | 1.63E-88  | 266 |
| ASM19601v1  | ABF07709.1_848  | 40.3 | 315 | 184 | 4 | 1.19E-78  | 241 |
| ASM21921v1  | AEI78014.1_2644 | 40.3 | 310 | 185 | 0 | 1.14E-84  | 256 |
| ASM21921v1  | AEI82812.1_7442 | 38.5 | 299 | 181 | 3 | 6.09E-65  | 206 |
| ASM185428v1 | AOZ01685.1_3945 | 49.8 | 301 | 151 | 0 | 1.13E-108 | 318 |
| ASM185428v1 | AOZ03543.1_6178 | 45.2 | 292 | 159 | 1 | 1.75E-85  | 258 |
| ASM1866v1   | ABX32686.1_39   | 43.4 | 318 | 179 | 1 | 1.01E-89  | 269 |
| ASM221464v1 | ASI69578.1_2780 | 43.6 | 298 | 164 | 3 | 1.85E-86  | 261 |
| ASM221464v1 | ASI69870.1_3101 | 42.6 | 298 | 170 | 1 | 1.64E-85  | 259 |
| ASM221464v1 | ASI69870.1_3101 | 42.2 | 296 | 168 | 3 | 1.53E-80  | 246 |

Table S1

|             |                 |      |     |     |   |           |     |
|-------------|-----------------|------|-----|-----|---|-----------|-----|
| Hint_PBC    | AOS80664.1_3503 | 51.1 | 305 | 143 | 3 | 1.14E-103 | 305 |
| Hint_PBC    | AOS81499.1_4430 | 37.5 | 312 | 189 | 4 | 7.68E-63  | 200 |
| Hint_PBC    | AOS81910.1_4887 | 35.3 | 306 | 197 | 1 | 4.35E-63  | 201 |
| ASM1362v1   | ABR89622.1_470  | 62.8 | 304 | 113 | 0 | 4.16E-136 | 387 |
| ASM1362v1   | ABR89757.1_1291 | 40.1 | 302 | 180 | 1 | 6.95E-73  | 226 |
| ASM1978v1   | ACB32994.1_718  | 51.5 | 326 | 157 | 1 | 1.76E-115 | 335 |
| ASM141253v1 | ALK89897.1_2653 | 47.7 | 300 | 157 | 0 | 1.3E-98   | 291 |
| ASM1550v1   | ABM40046.1_4719 | 41.2 | 301 | 176 | 1 | 5.65E-82  | 249 |
| ASM1386v1   | ABE43844.1_1877 | 54.6 | 304 | 137 | 1 | 2.48E-121 | 350 |
| ASM1386v1   | ABE42578.1_611  | 51.9 | 324 | 149 | 4 | 4.23E-115 | 333 |
| ASM1386v1   | ABE44216.1_2249 | 44.1 | 315 | 176 | 0 | 3.16E-95  | 283 |
| ASM1386v1   | ABE46273.1_4306 | 43.8 | 317 | 177 | 1 | 4.3E-89   | 267 |
| ASM1386v1   | ABE46979.1_5012 | 39.5 | 304 | 181 | 3 | 1.02E-76  | 235 |
| ASM928v2    | CAJ95007.1_3852 | 37.1 | 318 | 190 | 5 | 4.15E-73  | 227 |
| ASM21570v1  | AEG92762.1_1703 | 51.3 | 298 | 145 | 0 | 3.24E-110 | 322 |
| ASM21570v1  | AEG93472.1_2413 | 47.0 | 330 | 169 | 1 | 7.38E-105 | 308 |
| ASM195571v1 | APW43304.1_2498 | 40.9 | 323 | 186 | 2 | 8.51E-86  | 259 |
| ASM195569v1 | APW39675.1_4495 | 51.4 | 323 | 151 | 1 | 6.03E-111 | 323 |
| ASM28425v1  | BAL96432.1_3093 | 62.5 | 301 | 113 | 0 | 8.86E-132 | 376 |
| ASM157726v1 | AMM25888.1_3386 | 40.9 | 320 | 186 | 2 | 6.52E-87  | 262 |
| ASM1556v1   | ABM59508.1_3715 | 49.5 | 291 | 145 | 2 | 4.21E-94  | 280 |
| ASM1556v1   | ABM59508.1_3715 | 44.1 | 322 | 179 | 1 | 2.8E-100  | 296 |
| ASM1840v1   | ABW68105.1_2295 | 36.0 | 311 | 199 | 0 | 2.32E-64  | 204 |
| ASM1840v1   | ABW68105.1_2295 | 30.3 | 304 | 193 | 8 | 1.42E-34  | 127 |
| ASM30000v1  | AFT68689.1_400  | 40.5 | 309 | 179 | 4 | 6.75E-69  | 215 |

Table S2

Supplementary Table 2 for the manuscript "Massive overrepresentation of solute binding proteins (SBPs) from the tripartite tricarboxylate transporter (TTT) f  
Supplementary Table 2: Number of TBLASTN hits belonging to different species, from the analysis of the 434 TTT SBP from *Rhodoplanes sp.* Z2-YC6860

| <b>species</b>                           | <b>subclass</b>     | <b>number of Rhodoplanes best hits</b> |
|------------------------------------------|---------------------|----------------------------------------|
| Rhodoplanes sp Z2 YC6860                 | Alphaproteobacteria | 234                                    |
| Pseudorhodoplanes sinuspersici           | Alphaproteobacteria | 72                                     |
| Bradyrhizobium icense                    | Alphaproteobacteria | 15                                     |
| Bordetella flabilis                      | Betaproteobacteria  | 8                                      |
| Bordetella genomosp 13                   | Betaproteobacteria  | 7                                      |
| Bordetella sp H567                       | Betaproteobacteria  | 7                                      |
| Cupriavidus basilensis                   | Betaproteobacteria  | 6                                      |
| Alicyclophilus denitrificans BC          | Betaproteobacteria  | 5                                      |
| Bordetella bronchialis                   | Betaproteobacteria  | 5                                      |
| Bordetella hinzii                        | Betaproteobacteria  | 5                                      |
| Polaromonas sp JS666                     | Betaproteobacteria  | 5                                      |
| Bradyrhizobium oligotrophicum S58        | Alphaproteobacteria | 4                                      |
| Achromobacter xylosoxidans A8            | Betaproteobacteria  | 4                                      |
| Bradyrhizobium japonicum USDA 6          | Alphaproteobacteria | 3                                      |
| Cupriavidus gilardii CR3                 | Betaproteobacteria  | 3                                      |
| Diaphorobacter polyhydroxybutyrativorans | Betaproteobacteria  | 3                                      |
| Hydrogenophaga sp PBC                    | Betaproteobacteria  | 3                                      |
| Bradyrhizobium diazoefficiens USDA 110   | Alphaproteobacteria | 2                                      |
| Roseomonas gilardii                      | Alphaproteobacteria | 2                                      |
| Achromobacter insolitus                  | Betaproteobacteria  | 2                                      |
| Advenella kashmirensis WT001             | Betaproteobacteria  | 2                                      |
| Bordetella pertussis B1917               | Betaproteobacteria  | 2                                      |
| Bordetella petrii                        | Betaproteobacteria  | 2                                      |
| Bordetella pseudohinzii                  | Betaproteobacteria  | 2                                      |
| Cupriavidus metallidurans CH34           | Betaproteobacteria  | 2                                      |
| Cupriavidus necator N 1                  | Betaproteobacteria  | 2                                      |
| Cupriavidus sp USMAHM13                  | Betaproteobacteria  | 2                                      |
| Janthinobacterium sp Marseille           | Betaproteobacteria  | 2                                      |
| Ramlibacter tataouinensis TTB310         | Betaproteobacteria  | 2                                      |

Table S2

|                                   |                     |   |
|-----------------------------------|---------------------|---|
| Verminephrobacter eiseniae EF01 2 | Betaproteobacteria  | 2 |
| Desulfococcus oleovorans Hxd3     | Deltaproteobacteria | 2 |
| Bosea sp PAMC 26642               | Alphaproteobacteria | 1 |
| Polymorphum gilvum SL003B 26A1    | Alphaproteobacteria | 1 |
| Sinorhizobium meliloti 1021       | Alphaproteobacteria | 1 |
| Achromobacter denitrificans       | Betaproteobacteria  | 1 |
| Bordetella bronchiseptica RB50    | Betaproteobacteria  | 1 |
| Bordetella parapertussis 12822    | Betaproteobacteria  | 1 |
| Bordetella trematum               | Betaproteobacteria  | 1 |
| Delftia acidovorans SPH 1         | Betaproteobacteria  | 1 |
| Leptothrix cholodnii SP 6         | Betaproteobacteria  | 1 |
| Limnohabitans sp 63ED37 2         | Betaproteobacteria  | 1 |
| Polaromonas naphthalenivorans CJ2 | Betaproteobacteria  | 1 |
| Ralstonia eutropha H16            | Betaproteobacteria  | 1 |
| Rhodiferax saidenbachensis        | Betaproteobacteria  | 1 |
| Rhodiferax sp DCY110              | Betaproteobacteria  | 1 |
| Rubrivivax gelatinosus IL144      | Betaproteobacteria  | 1 |
| Variovorax sp PAMC 28711          | Betaproteobacteria  | 1 |
| Alcanivorax dieselolei B5         | Gammaproteobacteria | 1 |

Table S2

family in the genome of the  $\alpha$ -proteobacterium *Rhodoplanes* sp. Z2-YC6860"
